# Supplementary material for: Acenaphthene-triphenylamine (acceptor–donor) based luminophores for organic light emitting diodes: combined experimental and theoretical study
Source: Royal Society of Chemistry journal article supplement (doi:10.1039/d1ma00583a), 2021-10-20
Supplement: d1ma00583a1.pdf [file d1ma00583a1.pdf]

## **Acenaphthene-Triphenylamine (Acceptor-Donor) based luminophores for organic light emitting diodes: combined experimental and theoretical study**

Jairam Tagare, Aravind Babu Kajjam, Kasturi Singh, Sabita Patel and Sivakumar Vaidyanathan\*

Department of Chemistry, National Institute of Technology Rourkela, India.

### **Contents:**

#### **SI1 NMR spectra (<sup>1</sup>H, <sup>13</sup>C and <sup>19</sup>F) of the dyes**

**Fig. S1.** The <sup>1</sup>H NMR spectra of the AC-Ph

**Fig. S2.** The <sup>13</sup>C NMR spectra of the AC-Ph

**Fig. S3.** The <sup>1</sup>H NMR spectra of the AC-PT

**Fig. S4.** The <sup>13</sup>C NMR spectra of the AC-PT

**Fig. S5.** The <sup>1</sup>H NMR spectra of the AC-F1

**Fig. S6.** The <sup>13</sup>C NMR spectra of the AC-F1

**Fig. S7.** The <sup>1</sup>H NMR spectra of the AC-mCF3

**Fig. S8.** The <sup>13</sup>C NMR spectra of the AC- mCF3

**Fig. S9.** The <sup>19</sup>F NMR spectra of the AC- mCF3

**Fig. S10.** The <sup>1</sup>H NMR spectra of the AC- pCF3

**Fig. S11.** The <sup>13</sup>C NMR spectra of the AC- pCF3

**Fig. S12.** The <sup>19</sup>F NMR spectra of the AC- pCF3

#### **SI2 Mass spectra of the dyes**

**Fig. S13.** The mass spectra of the AC-Ph

**Fig. S14.** The mass spectra of the AC-PT

**Fig. S15.** The mass spectra of the AC-F1

**Fig. S16.** The mass spectra of the AC- mCF3

**Fig. S17.** The mass spectra of the AC- pCF3

#### **SI3 Fourier transform infrared (FTIR) Spectroscopy**

**Fig. S18.** Fourier transform infrared spectra of all the dyes

#### **SI4 Crystal data and Atom coordinates of Acenaphthene derivatives**

#### **SI4 Thermal properties**

## SI5 DFT data of Acenaphthene derivatives

## SI1 NMR spectra ( $^1\text{H}$ , $^{13}\text{C}$ and $^{19}\text{F}$ ) of the compounds

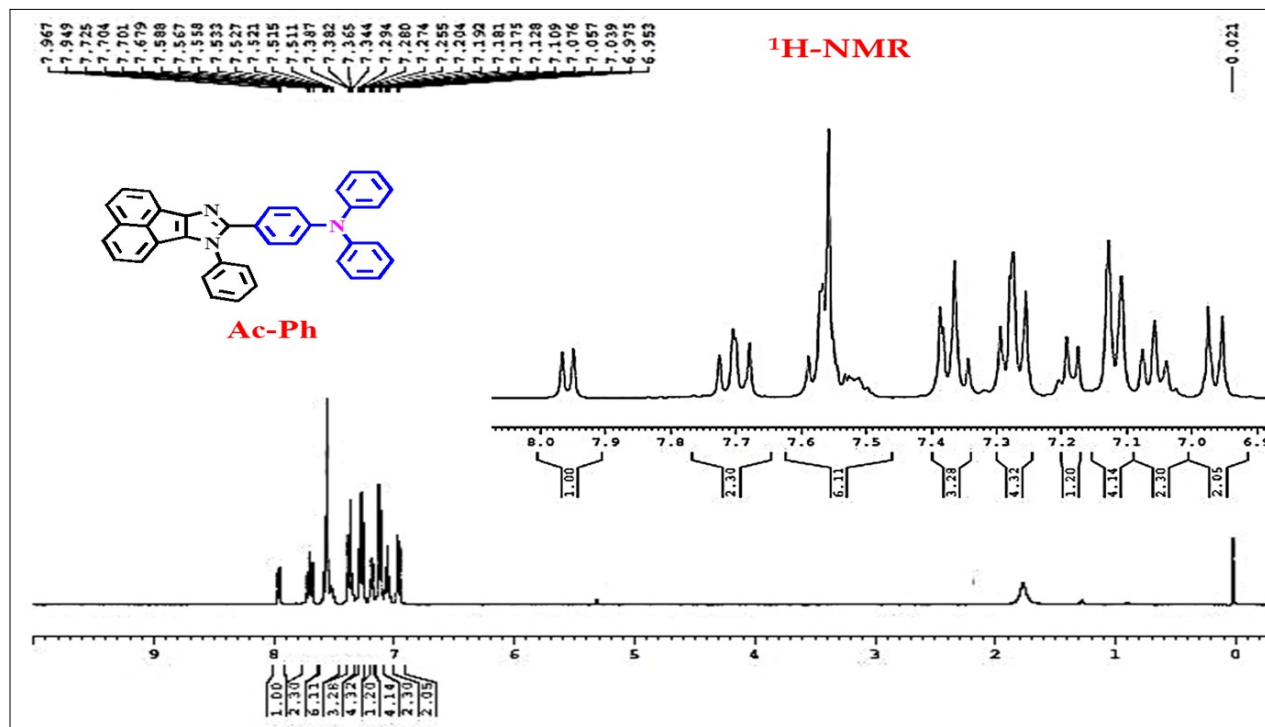

Fig. S1. The  $^1\text{H}$  NMR spectra of the AC-Ph

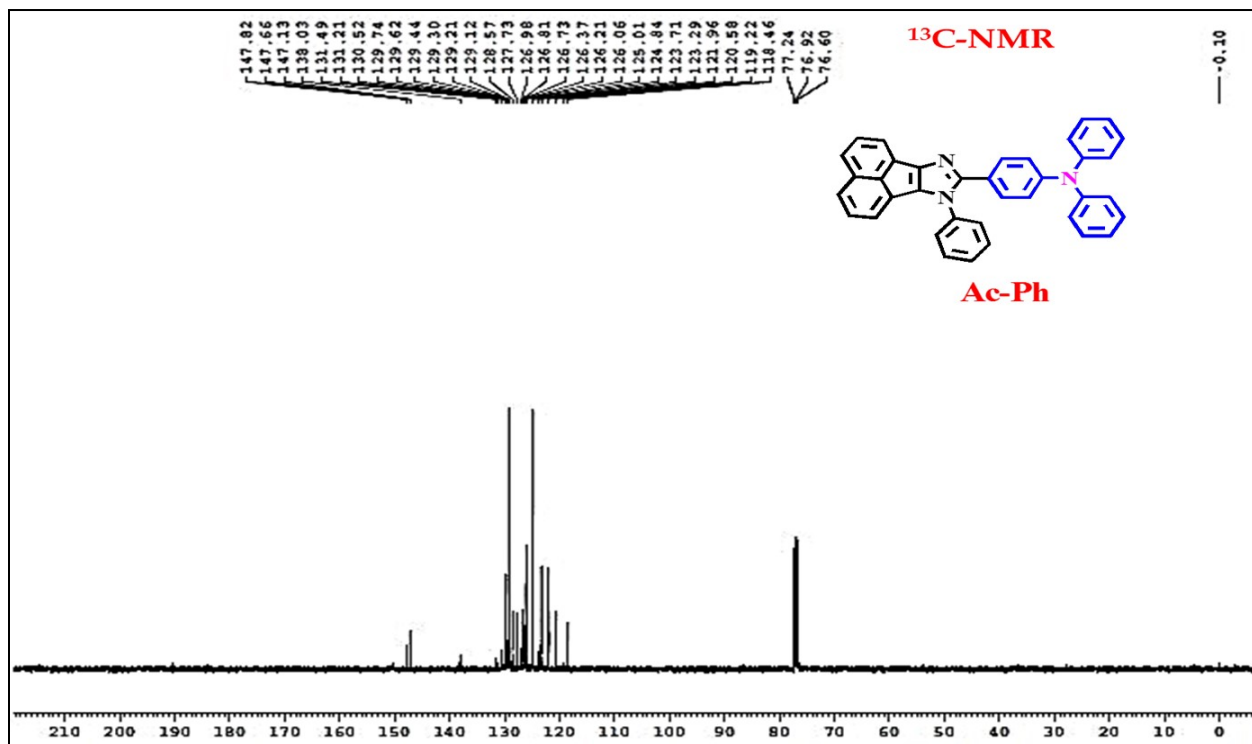

Fig. S2. The  $^{13}\text{C}$  NMR spectra of the AC-Ph

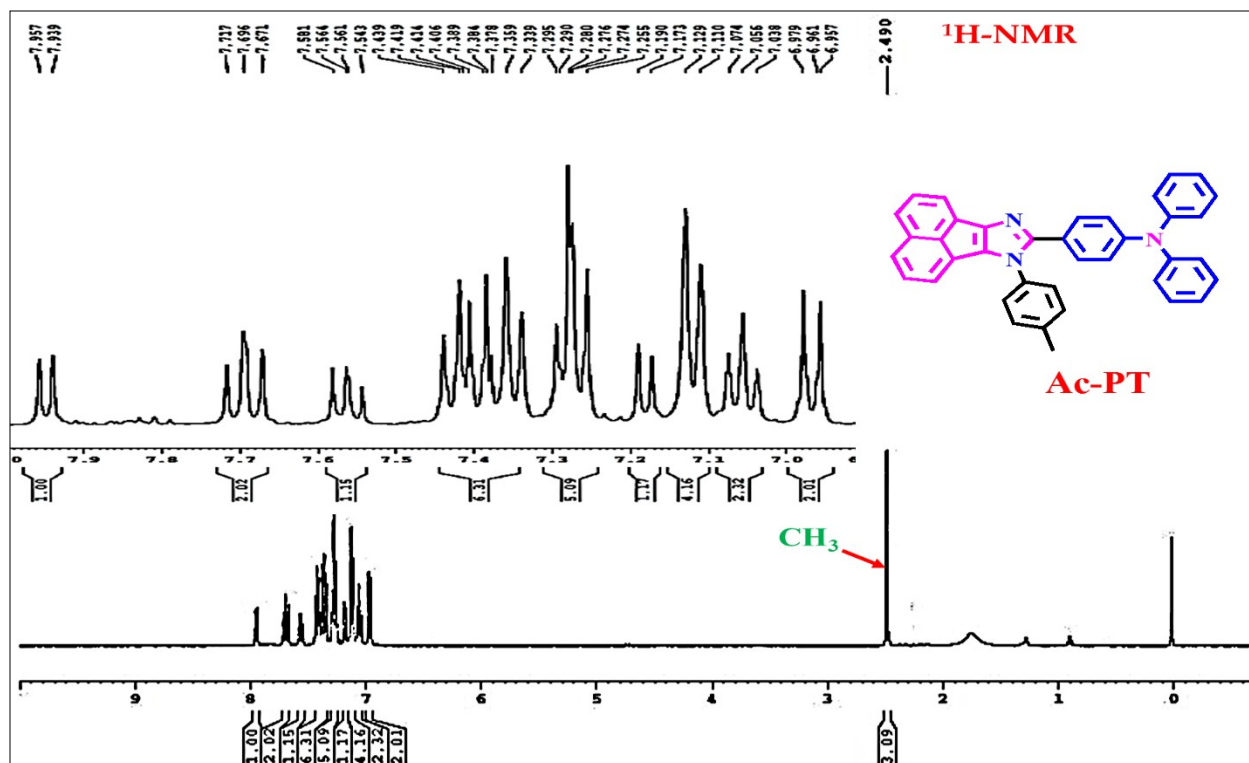

Fig. S3. The <sup>1</sup>H NMR spectra of the AC-PT

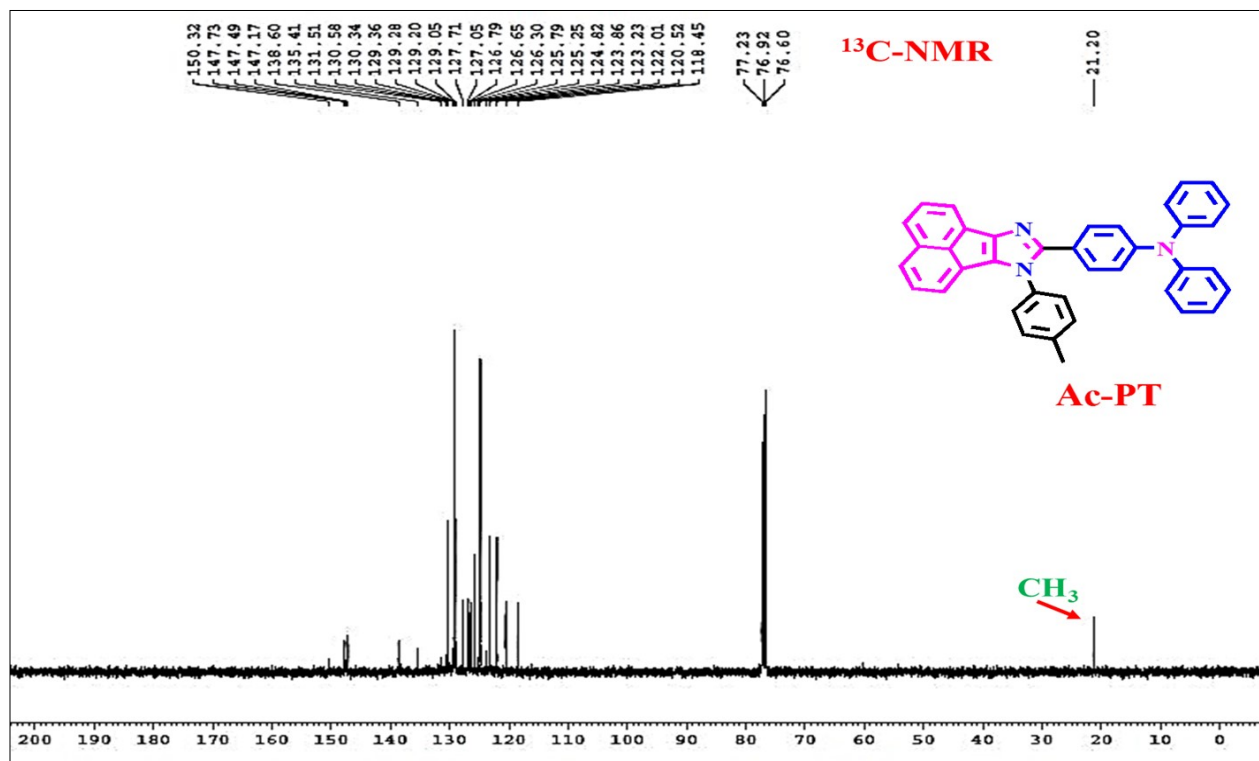

Fig. S4. The <sup>13</sup>C NMR spectra of the AC-PT

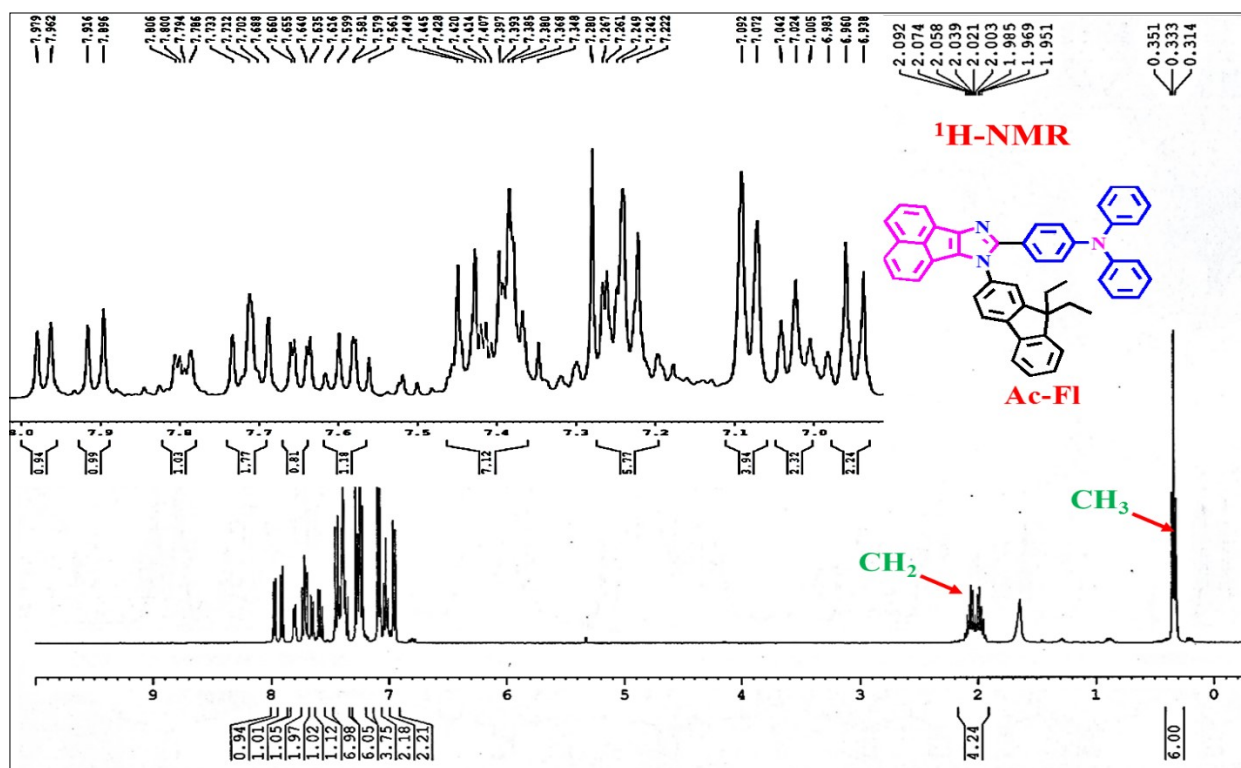

Fig. S5. The <sup>1</sup>H NMR spectra of the AC-FI

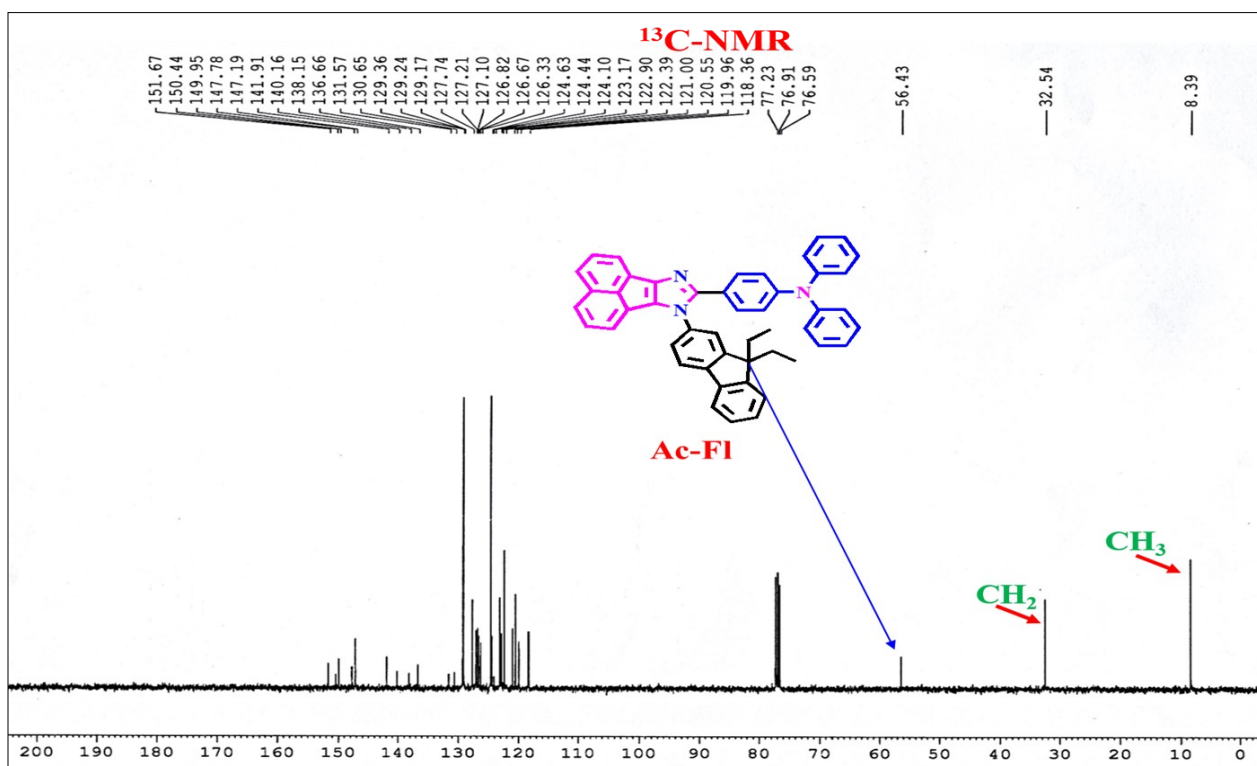

Fig. S6. The <sup>13</sup>C NMR spectra of the AC-FI

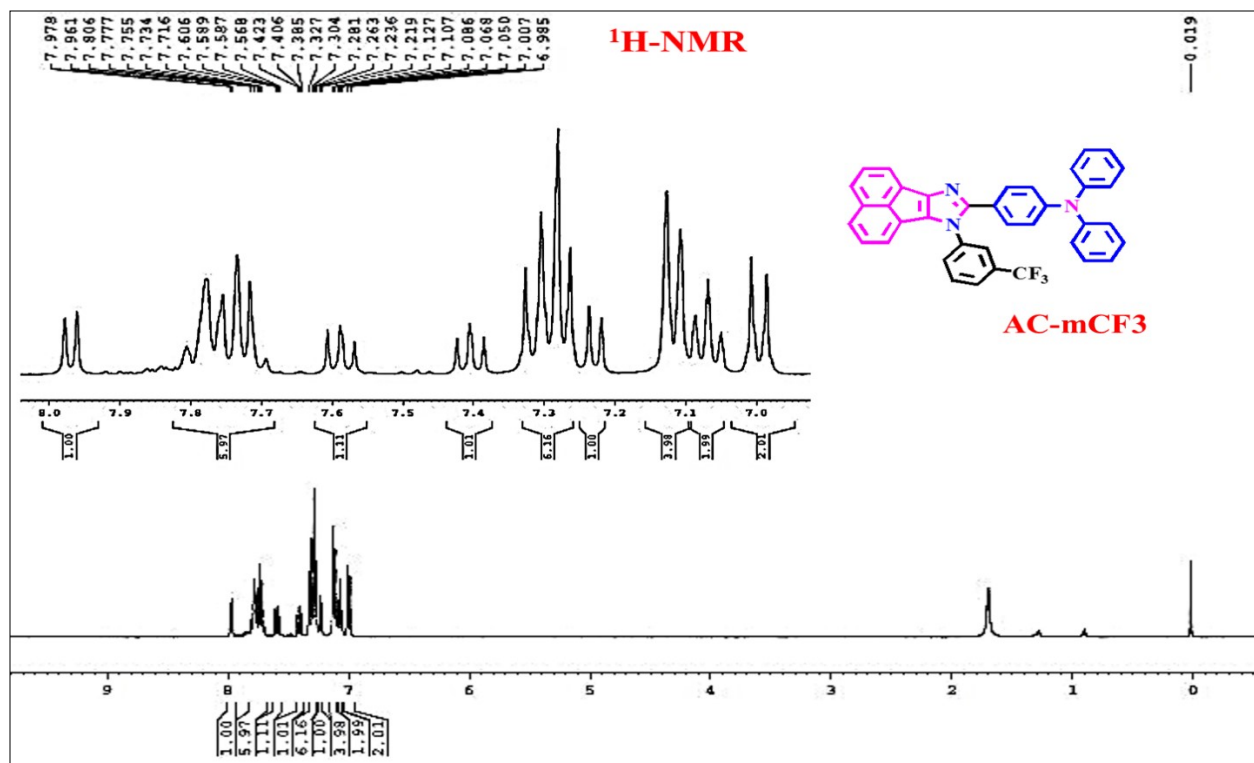

**Fig. S7.** The  $^1\text{H}$  NMR spectra of the AC-mCF<sub>3</sub>

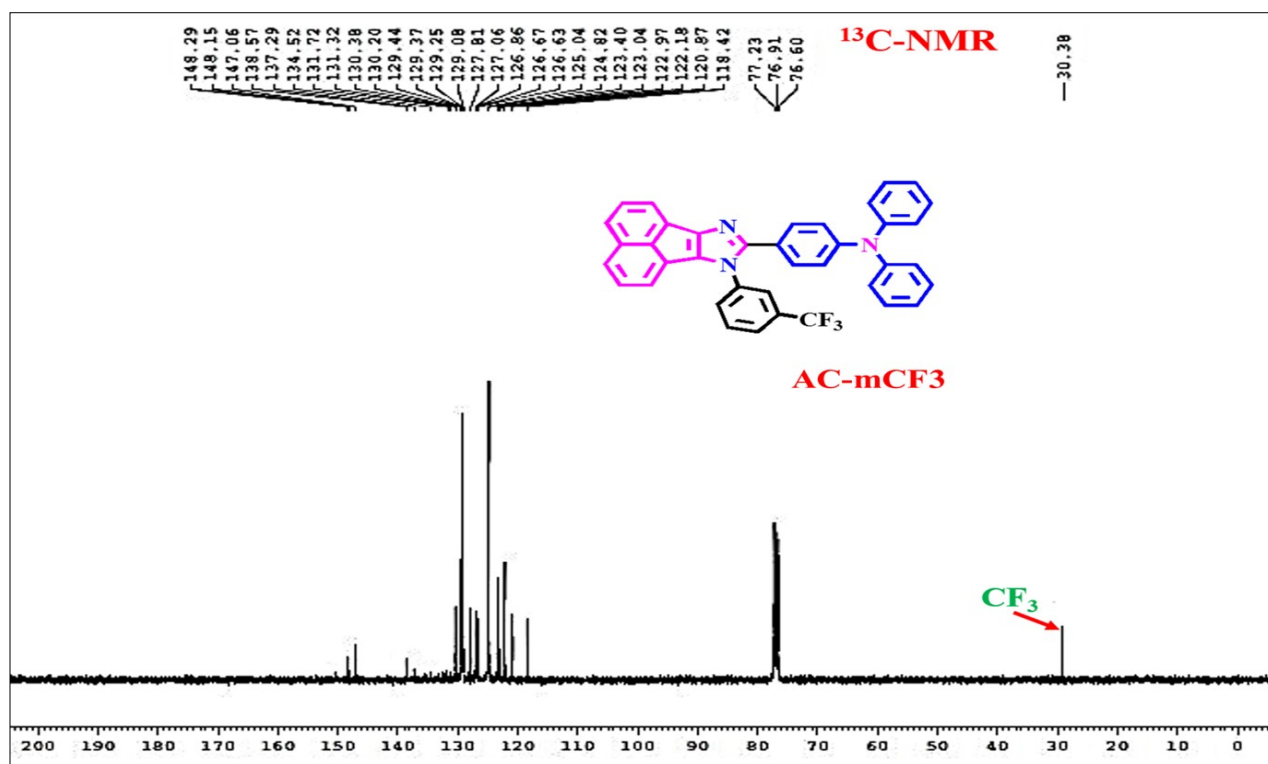

**Fig. S8.** The  $^{13}\text{C}$  NMR spectra of the AC-mCF<sub>3</sub>

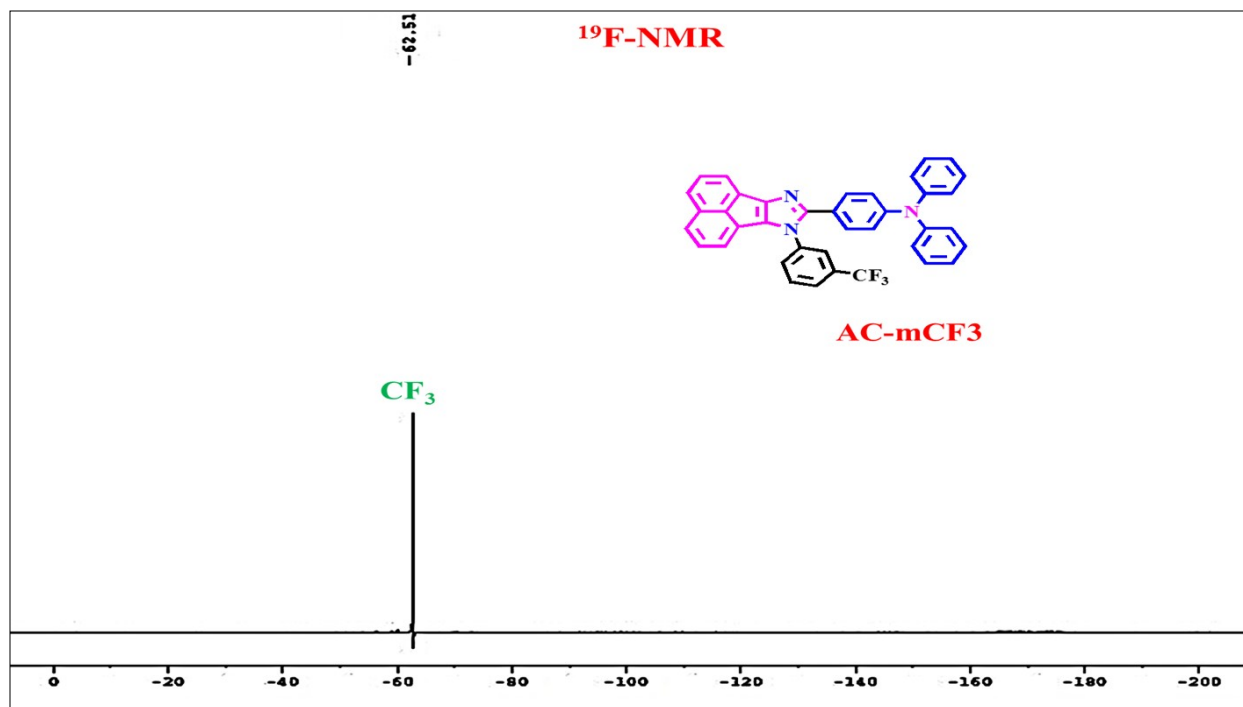

Fig. S9. The <sup>19</sup>F NMR spectra of the AC-mCF3

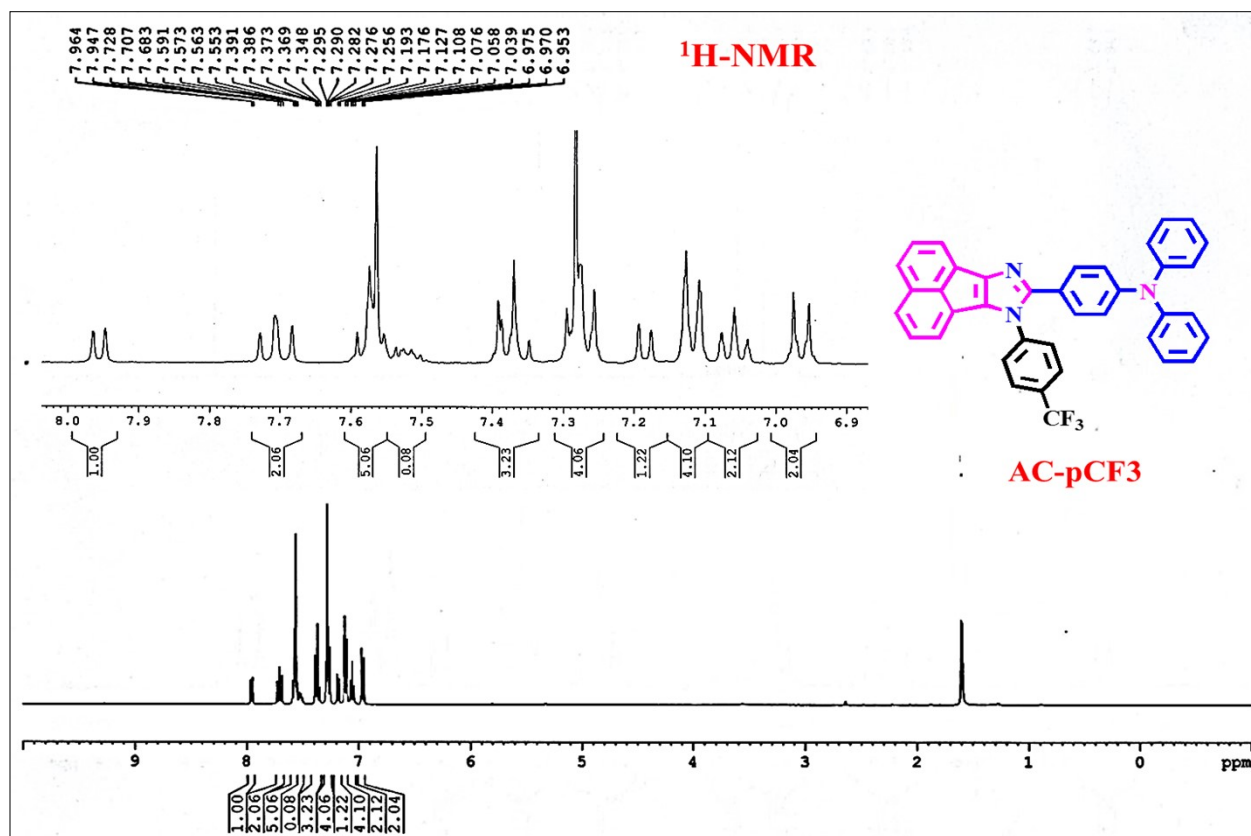

Fig. S10. The <sup>1</sup>H NMR spectra of the AC-pCF3

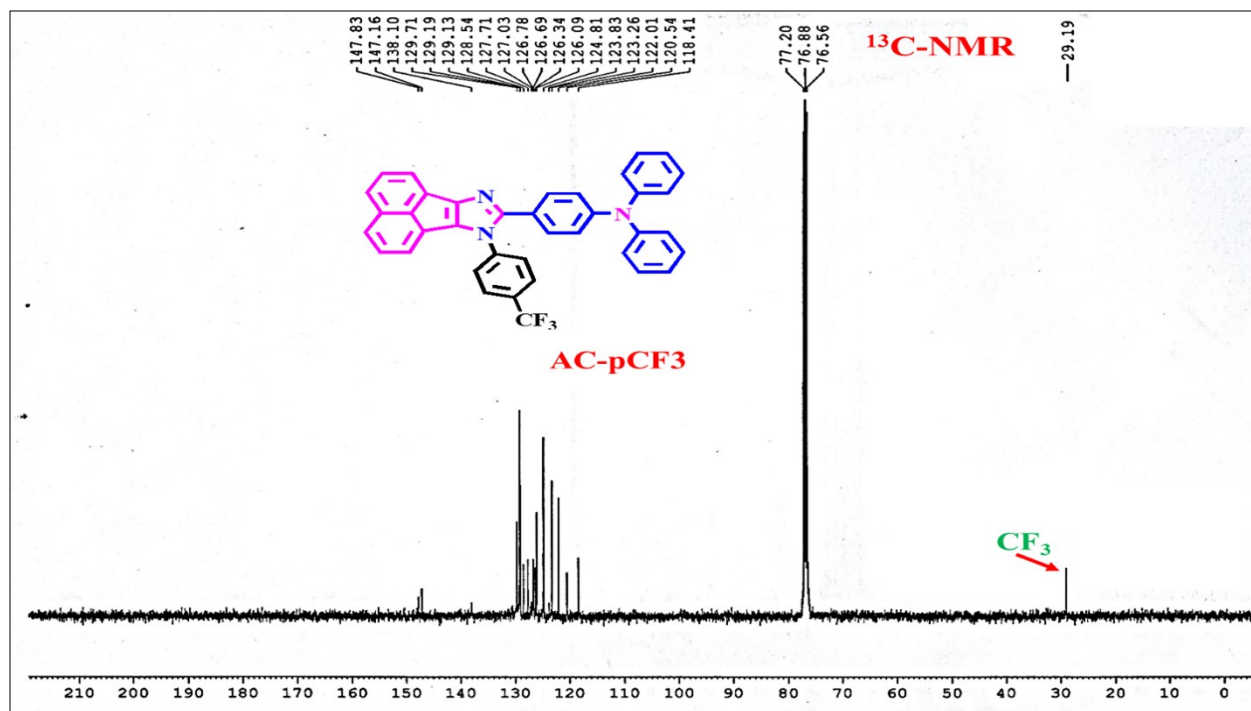

Fig. S11. The <sup>13</sup>C NMR spectra of the AC-pCF<sub>3</sub>

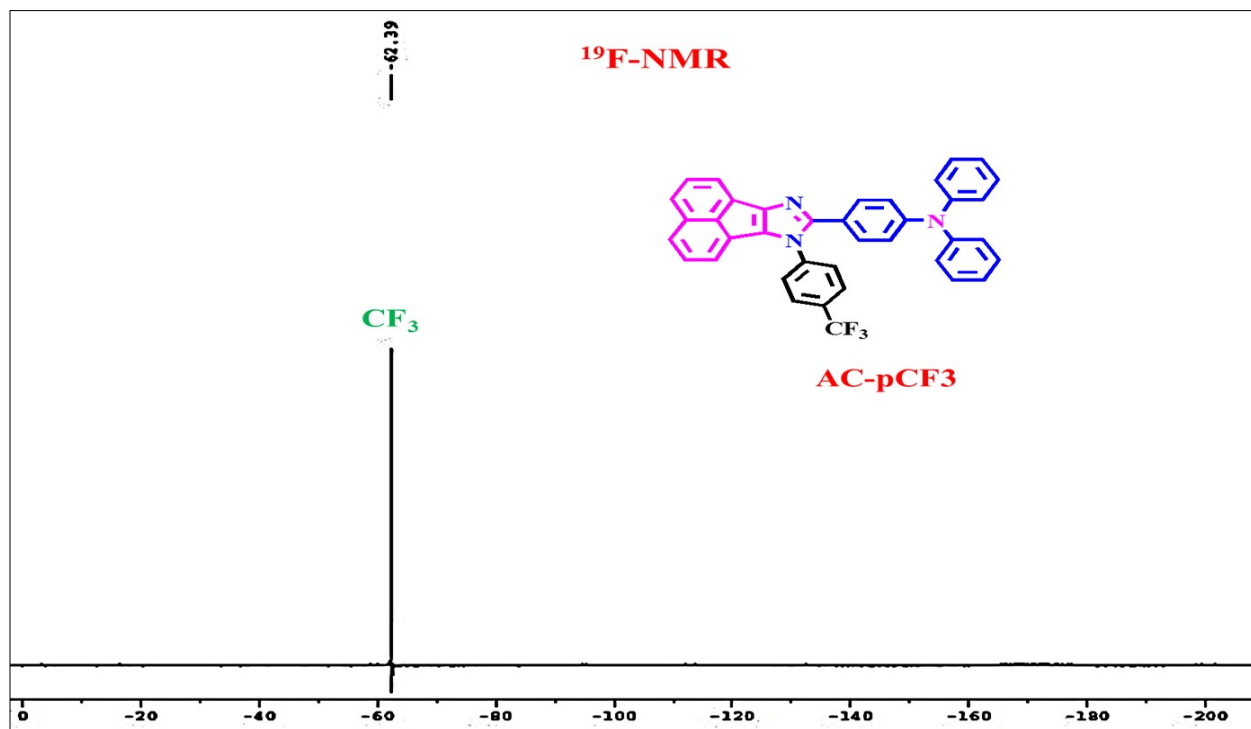

Fig. S12. The <sup>19</sup>F NMR spectra of the AC-pCF<sub>3</sub>

## SI2 Mass spectra of the compounds

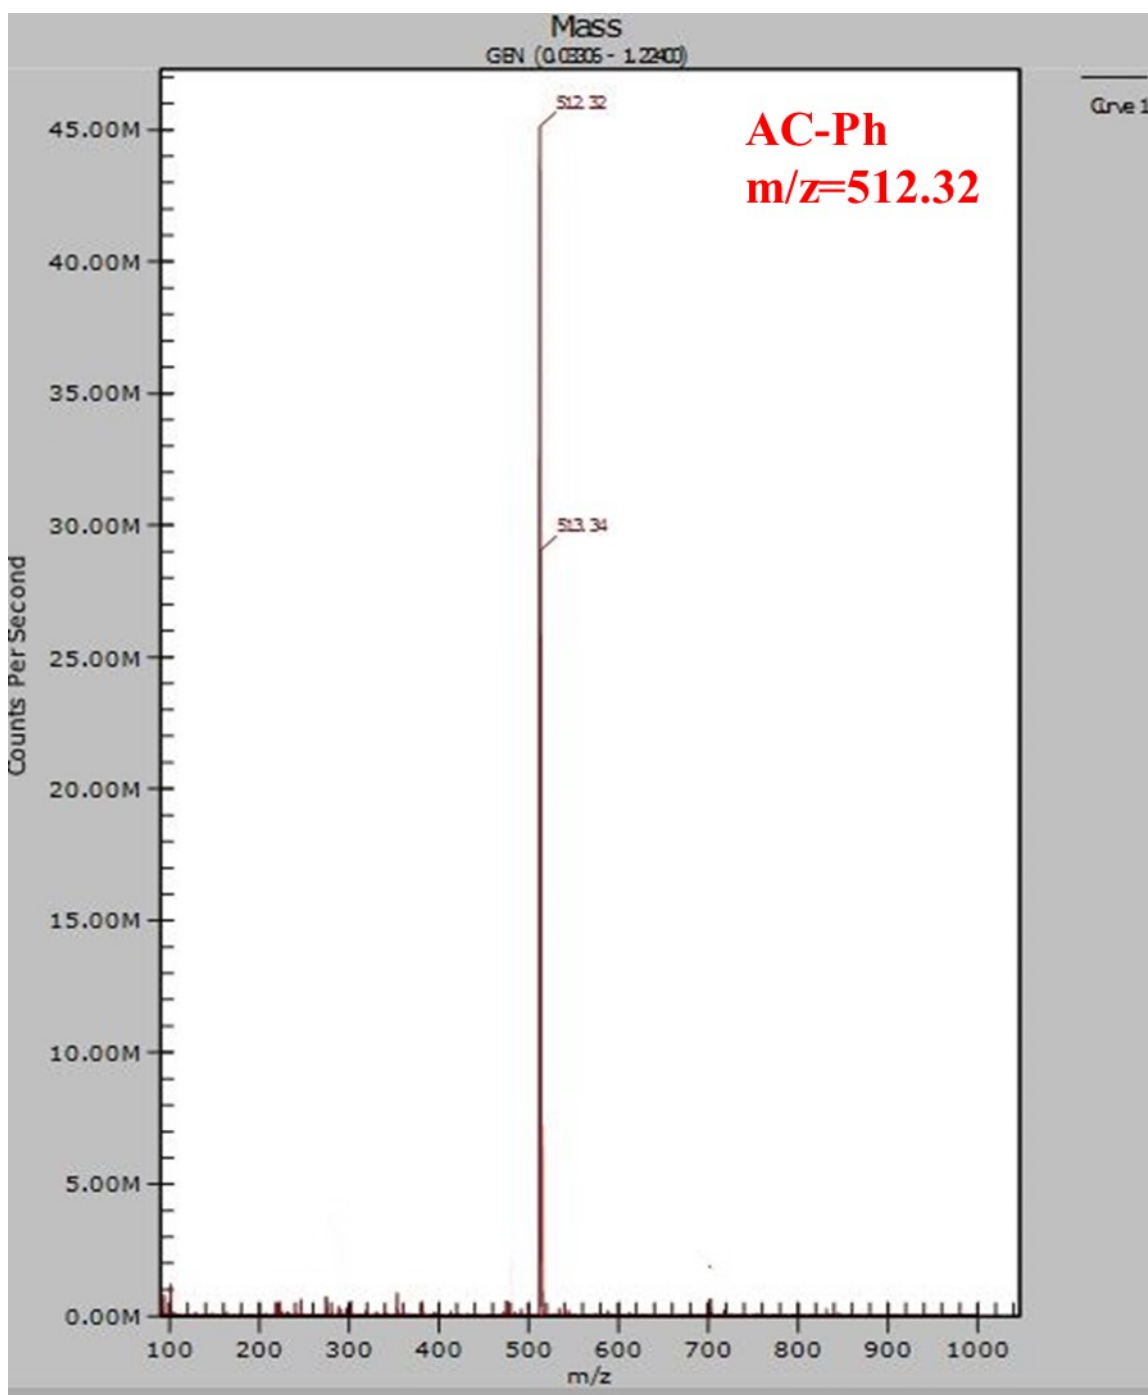

Fig. S13. The mass spectra of the AC-Ph



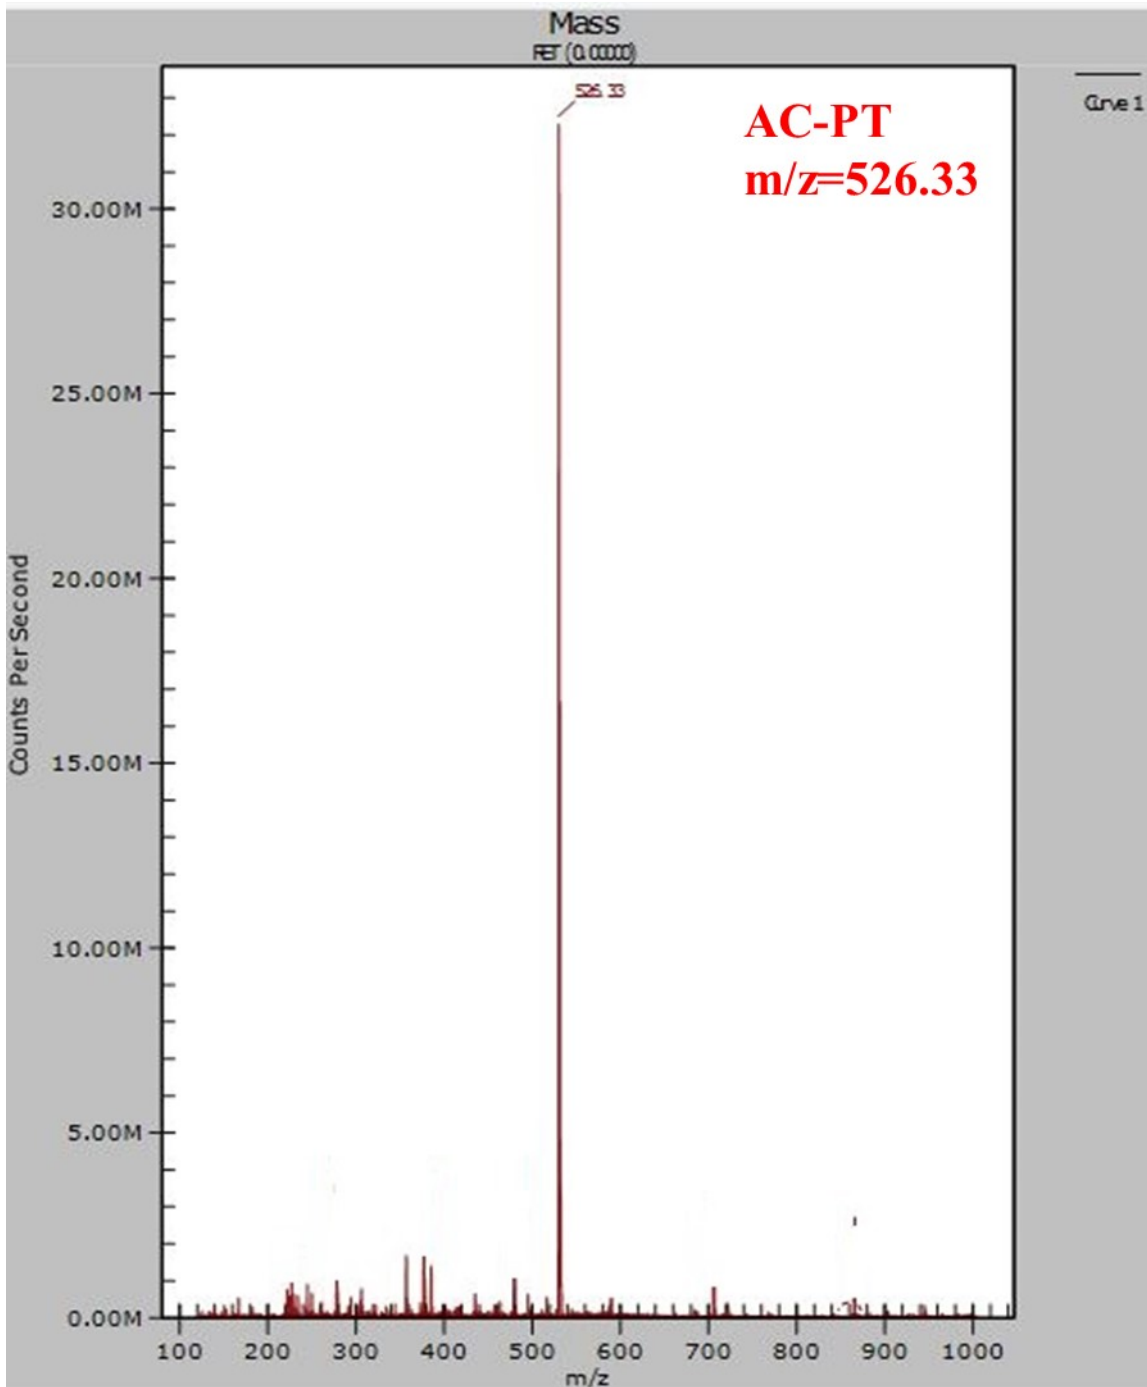

Fig. S14. The mass spectra of the AC-PT

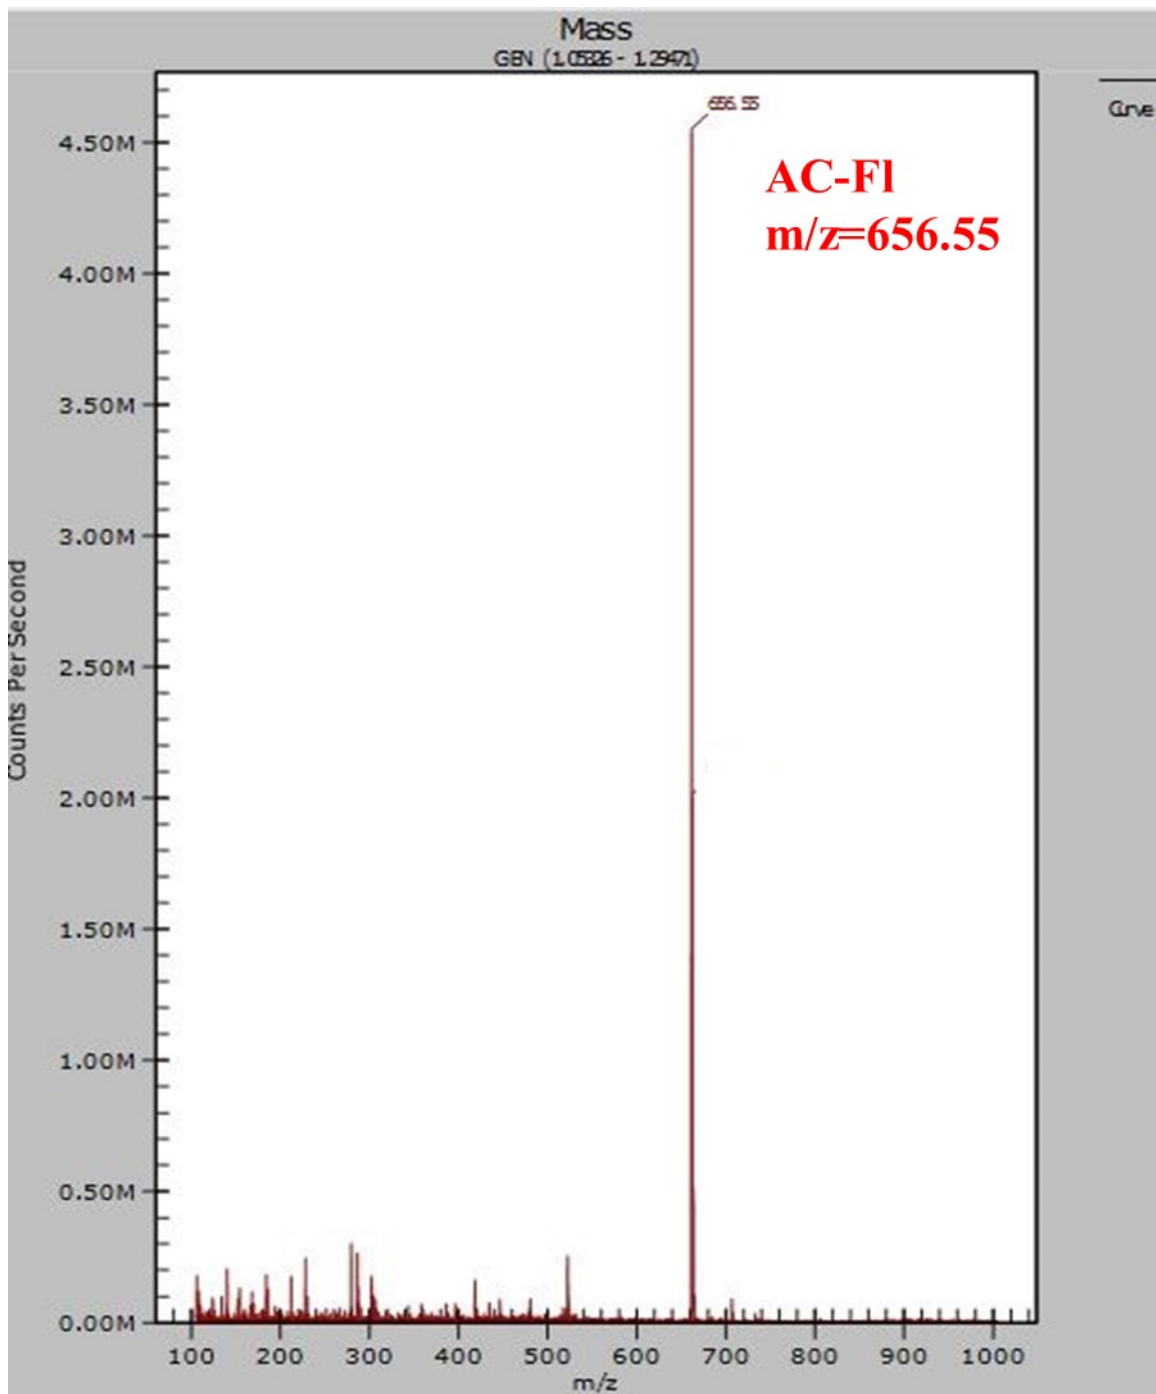

**Fig. S15.** The mass spectra of the AC-FI

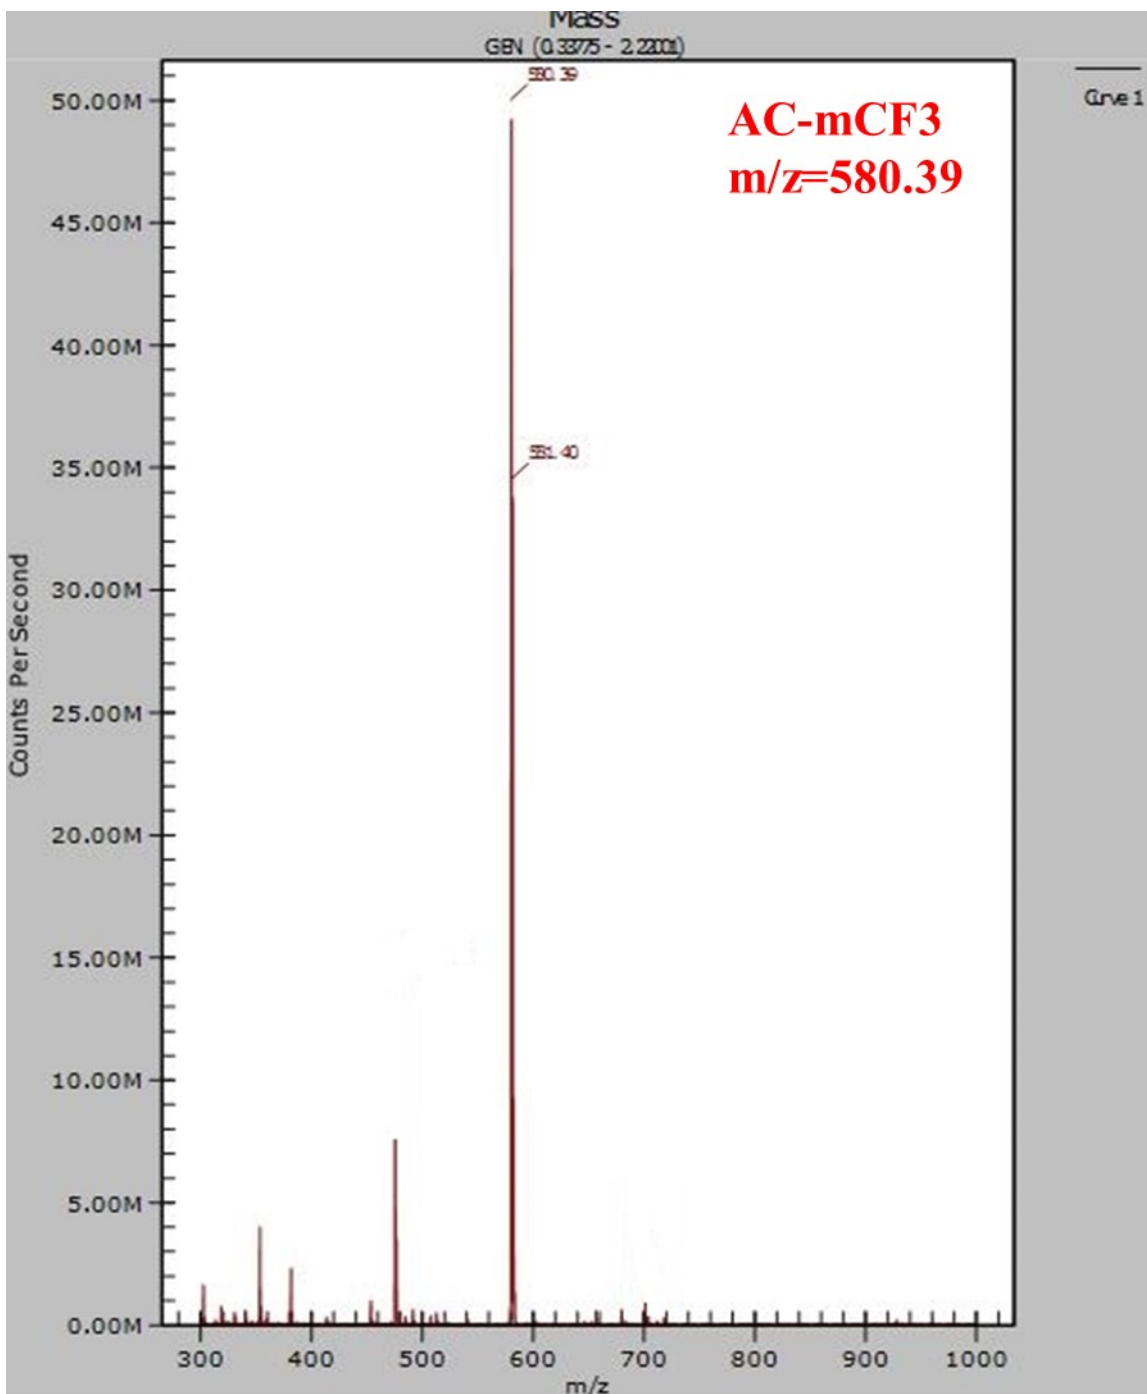

Fig. S16. The mass spectra of the AC-mCF3

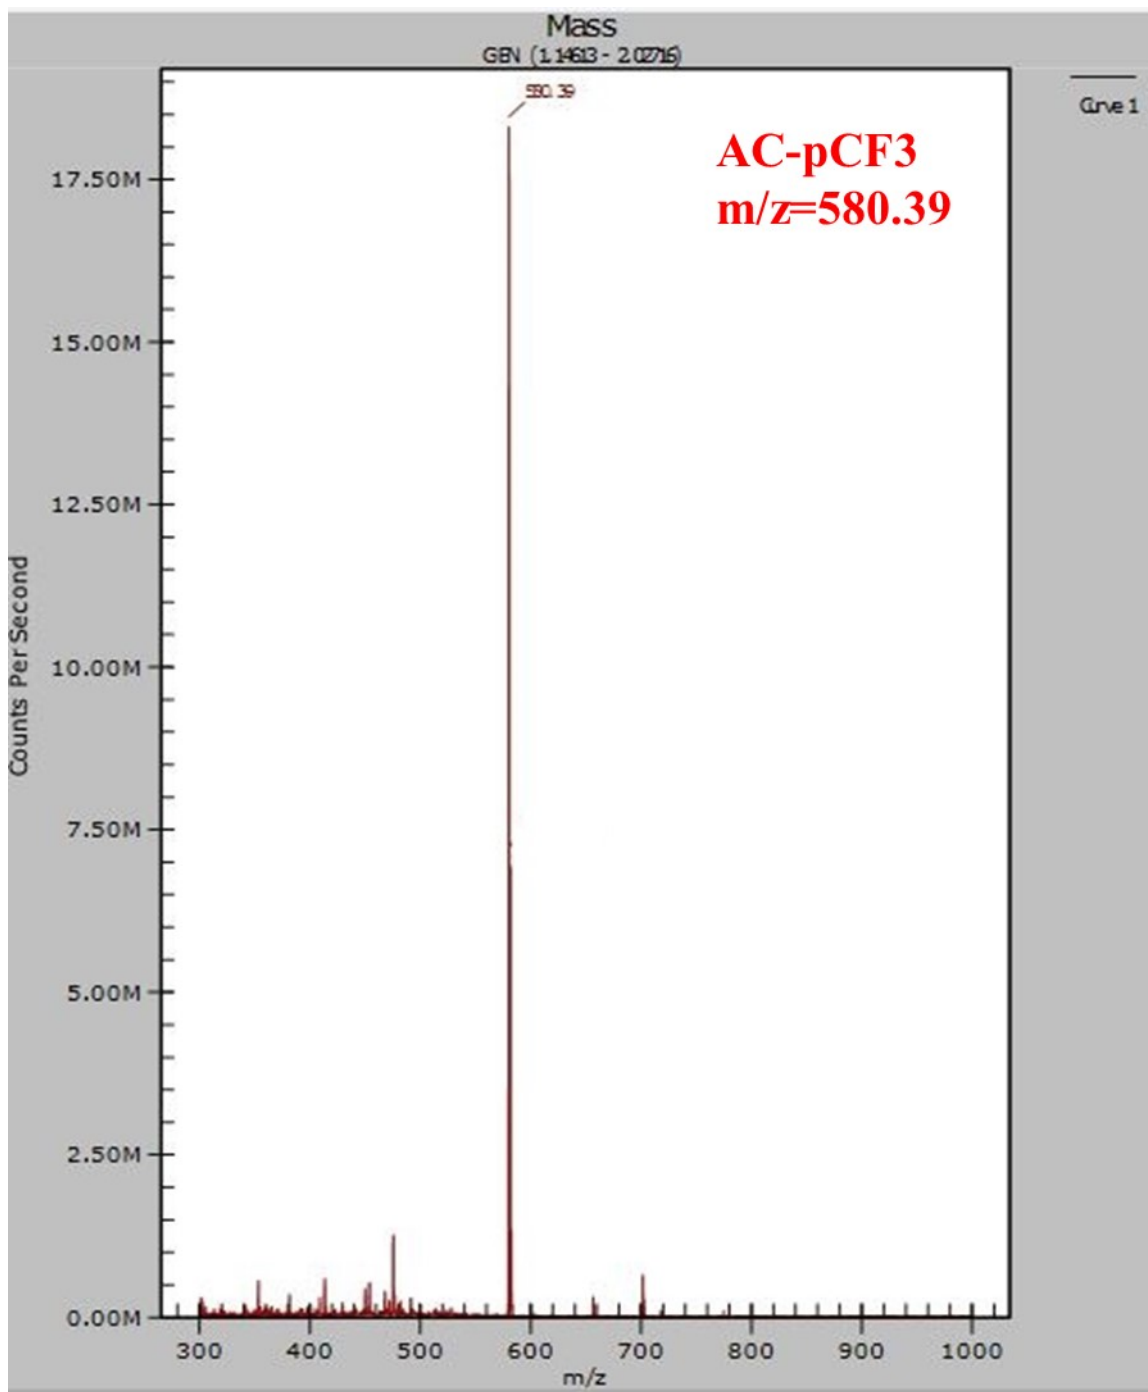

Fig. S17. The mass spectra of the AC-pCF<sub>3</sub>

### SI3 Fourier transform infrared (FTIR) Spectroscopy

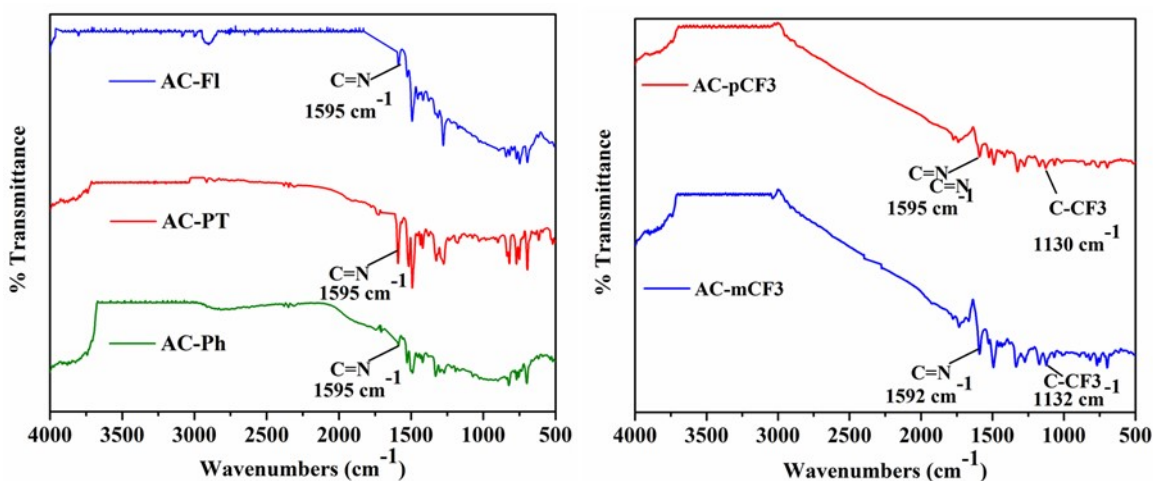

Fig. S18. Fourier transform infrared spectra of all the dyes

Table S1 The major FT-IR bands [ $\text{cm}^{-1}$ ] of all the dyes

| Bonding                                           | AC-Ph                  | AC-PT                        | AC-Fl                        | AC-mCF3                      | AC-pCF3                            |
|---------------------------------------------------|------------------------|------------------------------|------------------------------|------------------------------|------------------------------------|
| C=N                                               | 1595                   | 1595                         | 1595                         | 1592                         | 1595                               |
| C-CF3                                             | -                      | -                            | -                            | 1130                         | 1132                               |
| Aromatic -CH2-CH3, C-C, C=C stretching frequency. | 1496, 1416, 1336, 1266 | 1488, 1420, 1324, 1274, 1180 | 2894, 1488, 1418, 1318, 1278 | 1492, 1333, 1273, 1163, 1073 | 1486, 1416, 1326, 1276, 1166, 1066 |
| C-H bending                                       | 816, 766, 696          | 825, 755, 695                | 838, 749, 699                | 813, 773, 703                | 836, 766, 696                      |

Table S2. Crystal data and structure-refinement parameters of AC-Ph, AC-PT and AC-mCF3.

| Identification code | AC-Ph                                  | AC-PT                                  | AC-mCF3                                          |
|---------------------|----------------------------------------|----------------------------------------|--------------------------------------------------|
| Empirical formula   | $\text{C}_{37}\text{H}_{25}\text{N}_3$ | $\text{C}_{38}\text{H}_{27}\text{N}_3$ | $\text{C}_{76}\text{H}_{48}\text{F}_6\text{N}_6$ |
| Formula weight      | 511.60                                 | 525.63                                 | 1160.21                                          |
| Temperature/K       | 293(2)                                 | 293(2)                                 | 293(2)                                           |
| Crystal system      | monoclinic                             | triclinic                              | triclinic                                        |
| Space group         | $\text{P2}_1/\text{c}$                 | P1                                     | P1                                               |
| a/Å                 | 9.4757(3)                              | 11.9844(5)                             | 10.5459(7)                                       |
| b/Å                 | 33.1303(8)                             | 13.3254(5)                             | 10.6770(8)                                       |
| c/Å                 | 9.4560(5)                              | 17.9582(8)                             | 14.3890(10)                                      |
| $\alpha/^\circ$     | 90.00                                  | 101.962(4)                             | 103.037(6)                                       |
| $\beta/^\circ$      | 115.253(5)                             | 95.302(4)                              | 97.282(6)                                        |
| $\gamma/^\circ$     | 90.00                                  | 92.222(3)                              | 107.693(6)                                       |

|                                                         |                                                               |                                                               |                                                               |
|---------------------------------------------------------|---------------------------------------------------------------|---------------------------------------------------------------|---------------------------------------------------------------|
| <b>Volume/Å<sup>3</sup></b>                             | 2684.84(17)                                                   | 2788.6(2)                                                     | 1470.08(18)                                                   |
| <b>Z</b>                                                | 4                                                             | 4                                                             | 1                                                             |
| <b><math>\rho_{\text{calc}}</math>/cm<sup>3</sup></b>   | 1.266                                                         | 1.252                                                         | 1.311                                                         |
| <b><math>\mu</math>/mm<sup>-1</sup></b>                 | 0.575                                                         | 0.567                                                         | 0.741                                                         |
| <b>F(000)</b>                                           | 1072.0                                                        | 1104.0                                                        | 601.0                                                         |
| <b>Crystal size/mm<sup>3</sup></b>                      | 0.396 × 0.283 × 0.149                                         | 0.313 × 0.156 × 0.114                                         | 0.252 × 0.187 × 0.122                                         |
| <b>Radiation</b>                                        | CuK $\alpha$ ( $\lambda$ = 1.54184)                           | CuK $\alpha$ ( $\lambda$ = 1.54184)                           | CuK $\alpha$ ( $\lambda$ = 1.54184)                           |
| <b>2<math>\theta</math> range for data collection/°</b> | 10.32 to 133.76                                               | 7.56 to 133.86                                                | 9.06 to 133.96                                                |
| <b>Index ranges</b>                                     | -11 ≤ h ≤ 7, -39 ≤ k ≤ 39, -10 ≤ l ≤ 9                        | -14 ≤ h ≤ 11, -15 ≤ k ≤ 15, -21 ≤ l ≤ 20                      | -12 ≤ h ≤ 11, -10 ≤ k ≤ 12, -17 ≤ l ≤ 16                      |
| <b>Reflections collected</b>                            | 5501                                                          | 17383                                                         | 8334                                                          |
| <b>Independent reflections</b>                          | 3529 [R <sub>int</sub> = 0.0155, R <sub>sigma</sub> = 0.0234] | 9799 [R <sub>int</sub> = 0.0342, R <sub>sigma</sub> = 0.0458] | 5787 [R <sub>int</sub> = 0.0495, R <sub>sigma</sub> = 0.0430] |
| <b>Data/restraints/parameters</b>                       | 3529/0/361                                                    | 9799/0/741                                                    | 5787/3/793                                                    |
| <b>Goodness-of-fit on F<sup>2</sup></b>                 | 1.075                                                         | 1.030                                                         | 1.096                                                         |
| <b>Final R indexes [I ≥ 2<math>\sigma</math> (I)]</b>   | R <sub>1</sub> = 0.0409, wR <sub>2</sub> = 0.1072             | R <sub>1</sub> = 0.0553, wR <sub>2</sub> = 0.1543             | R <sub>1</sub> = 0.0667, wR <sub>2</sub> = 0.1955             |
| <b>Final R indexes [all data]</b>                       | R <sub>1</sub> = 0.0471, wR <sub>2</sub> = 0.1124             | R <sub>1</sub> = 0.0664, wR <sub>2</sub> = 0.1688             | R <sub>1</sub> = 0.0905, wR <sub>2</sub> = 0.2513             |
| <b>Largest diff. peak/hole / e Å<sup>-3</sup></b>       | 0.13/-0.15                                                    | 0.43/-0.34                                                    | 0.38/-0.34                                                    |

Table S3, S4, S5, S6, S7 and S8. The Bond Lengths and Bond Angles from single crystal XRD data of AC-Ph, AC-PT and AC-mCF3 dyes.

| <b>Table S3 Bond Lengths for AC-Ph</b> |             |                 |             |             |                 |
|----------------------------------------|-------------|-----------------|-------------|-------------|-----------------|
| <b>Atom</b>                            | <b>Atom</b> | <b>Length/Å</b> | <b>Atom</b> | <b>Atom</b> | <b>Length/Å</b> |
| N28                                    | C29         | 1.434(2)        | C10         | C5          | 1.397(2)        |
| N28                                    | C25         | 1.396(2)        | C8          | C9          | 1.367(2)        |
| N28                                    | C35         | 1.431(2)        | C8          | C7          | 1.418(3)        |
| N21                                    | C13         | 1.3267(19)      | C11         | C12         | 1.362(2)        |
| N21                                    | C12         | 1.368(2)        | C11         | C1          | 1.456(2)        |
| C26                                    | C27         | 1.381(2)        | C30         | C31         | 1.384(3)        |
| C26                                    | C25         | 1.395(2)        | C18         | C19         | 1.375(3)        |
| C27                                    | C22         | 1.390(2)        | C18         | C17         | 1.364(4)        |
| N14                                    | C13         | 1.3863(19)      | C9          | C12         | 1.473(2)        |
| N14                                    | C15         | 1.4375(18)      | C1          | C2          | 1.364(2)        |
| N14                                    | C11         | 1.371(2)        | C34         | C33         | 1.384(3)        |

|     |     |          |     |     |          |
|-----|-----|----------|-----|-----|----------|
| C24 | C25 | 1.397(2) | C33 | C32 | 1.364(3) |
| C24 | C23 | 1.378(2) | C3  | C4  | 1.363(3) |
| C13 | C22 | 1.470(2) | C3  | C2  | 1.419(3) |
| C29 | C30 | 1.383(3) | C7  | C6  | 1.362(3) |
| C29 | C34 | 1.374(3) | C4  | C5  | 1.413(3) |
| C15 | C16 | 1.378(3) | C5  | C6  | 1.416(3) |
| C15 | C20 | 1.369(3) | C36 | C37 | 1.387(3) |
| C40 | C35 | 1.386(2) | C39 | C38 | 1.363(4) |
| C40 | C39 | 1.380(3) | C16 | C17 | 1.385(3) |
| C35 | C36 | 1.375(3) | C37 | C38 | 1.370(3) |
| C23 | C22 | 1.386(2) | C19 | C20 | 1.382(2) |
| C10 | C9  | 1.421(2) | C32 | C31 | 1.371(4) |
| C10 | C1  | 1.424(2) |     |     |          |

**Table S4 Bond Angles for AC-Ph**

| Atom | Atom | Atom | Angle/°     | Atom | Atom | Atom | Angle/°     |
|------|------|------|-------------|------|------|------|-------------|
| C25  | N28  | C29  | 121.88 (13) | N14  | C11  | C1   | 141.67 (15) |
| C25  | N28  | C35  | 121.08 (14) | C12  | C11  | N14  | 106.53 (13) |
| C35  | N28  | C29  | 116.43 (13) | C12  | C11  | C1   | 111.79 (14) |
| C13  | N21  | C12  | 104.27 (12) | C29  | C30  | C31  | 119.3 (2)   |
| C27  | C26  | C25  | 121.04 (15) | C17  | C18  | C19  | 119.64 (17) |
| C26  | C27  | C22  | 121.29 (15) | C10  | C9   | C12  | 103.86 (14) |
| C13  | N14  | C15  | 129.66 (13) | C8   | C9   | C10  | 118.57 (16) |
| C11  | N14  | C13  | 105.43 (12) | C8   | C9   | C12  | 137.57 (16) |
| C11  | N14  | C15  | 124.58 (12) | N21  | C12  | C9   | 139.93 (14) |
| C23  | C24  | C25  | 120.90 (16) | C11  | C12  | N21  | 111.46 (13) |
| N21  | C13  | N14  | 112.31 (14) | C11  | C12  | C9   | 108.60 (14) |
| N21  | C13  | C22  | 122.99 (13) | C10  | C1   | C11  | 102.71 (14) |
| N14  | C13  | C22  | 124.52 (13) | C2   | C1   | C10  | 118.94 (18) |
| C30  | C29  | N28  | 121.55 (19) | C2   | C1   | C11  | 138.34 (18) |
| C34  | C29  | N28  | 119.18 (16) | C29  | C34  | C33  | 120.82 (19) |
| C34  | C29  | C30  | 119.26 (16) | C32  | C33  | C34  | 120.0 (2)   |

|     |     |     |             |  |     |     |     |             |
|-----|-----|-----|-------------|--|-----|-----|-----|-------------|
| N28 | C25 | C24 | 120.71 (15) |  | C4  | C3  | C2  | 122.42 (19) |
| C26 | C25 | N28 | 121.77 (15) |  | C6  | C7  | C8  | 122.74 (17) |
| C26 | C25 | C24 | 117.52 (14) |  | C3  | C4  | C5  | 120.95 (19) |
| C16 | C15 | N14 | 120.64 (16) |  | C10 | C5  | C4  | 116.02 (18) |
| C20 | C15 | N14 | 118.46 (16) |  | C10 | C5  | C6  | 115.95 (17) |
| C20 | C15 | C16 | 120.82 (15) |  | C4  | C5  | C6  | 128.02 (19) |
| C39 | C40 | C35 | 119.3 (2)   |  | C35 | C36 | C37 | 120.13 (19) |
| C40 | C35 | N28 | 120.38 (19) |  | C38 | C39 | C40 | 121.2 (2)   |
| C36 | C35 | N28 | 120.11 (16) |  | C1  | C2  | C3  | 118.4 (2)   |
| C36 | C35 | C40 | 119.51 (17) |  | C15 | C16 | C17 | 119.01 (19) |
| C24 | C23 | C22 | 121.65 (15) |  | C7  | C6  | C5  | 120.60 (17) |
| C27 | C22 | C13 | 122.70 (15) |  | C38 | C37 | C36 | 120.2 (2)   |
| C23 | C22 | C27 | 117.59 (14) |  | C18 | C19 | C20 | 120.5 (2)   |
| C23 | C22 | C13 | 119.50 (14) |  | C18 | C17 | C16 | 120.7 (2)   |
| C9  | C10 | C1  | 113.03 (15) |  | C33 | C32 | C31 | 119.59 (19) |
| C5  | C10 | C9  | 123.69 (16) |  | C15 | C20 | C19 | 119.30 (19) |
| C5  | C10 | C1  | 123.27 (16) |  | C39 | C38 | C37 | 119.56 (19) |
| C9  | C8  | C7  | 118.43 (17) |  | C32 | C31 | C30 | 121.0 (2)   |

**Table S5 Bond Lengths for AC-PT.**

| Atom | Atom | Length/Å  |  | Atom | Atom | Length/Å  |
|------|------|-----------|--|------|------|-----------|
| N0AA | C6   | 1.363 (2) |  | C28  | C62  | 1.505 (3) |
| N0AA | C10  | 1.329 (2) |  | C31  | C50  | 1.383 (3) |
| N2   | C9   | 1.435 (2) |  | C32  | C47  | 1.383 (3) |
| N2   | C10  | 1.389 (2) |  | C33  | C42  | 1.423 (3) |
| N2   | C16  | 1.374 (2) |  | C33  | C48  | 1.393 (3) |
| N1AA | C2AA | 1.397 (2) |  | C34  | N35  | 1.412 (3) |
| N1AA | C7   | 1.369 (2) |  | C34  | C54  | 1.374 (3) |
| N1AA | C19  | 1.438 (2) |  | C34  | C67  | 1.383 (4) |
| C2AA | N3AA | 1.325 (2) |  | N35  | C55  | 1.418 (3) |
| C2AA | C20  | 1.469 (2) |  | C37  | C39  | 1.383 (3) |



|      |     |           |  |      |      |           |
|------|-----|-----------|--|------|------|-----------|
| N3AA | C21 | 1.369 (2) |  | C38  | C52  | 1.385 (3) |
| C6   | C13 | 1.472 (2) |  | C40  | C1   | 1.375 (3) |
| C6   | C16 | 1.362 (3) |  | C40  | C2   | 1.388 (3) |
| C7   | C21 | 1.368 (3) |  | C41  | C45  | 1.423 (3) |
| C7   | C24 | 1.455 (2) |  | C41  | C59  | 1.405 (3) |
| C8   | C13 | 1.418 (3) |  | C42  | C57  | 1.364 (3) |
| C8   | C17 | 1.426 (3) |  | C43  | C1AA | 1.394 (4) |
| C8   | C41 | 1.396 (3) |  | C43  | C4AA | 1.345 (4) |
| C9   | C37 | 1.381 (3) |  | C44  | C58  | 1.417 (3) |
| C9   | C38 | 1.368 (3) |  | C45  | C49  | 1.355 (4) |
| C10  | C15 | 1.469 (2) |  | C46  | C60  | 1.416 (3) |
| C11  | C20 | 1.396 (2) |  | C47  | C51  | 1.371 (4) |
| C11  | C36 | 1.377 (3) |  | C48  | C63  | 1.411 (4) |
| C12  | C15 | 1.393 (3) |  | C48  | C65  | 1.422 (3) |
| C12  | C23 | 1.375 (3) |  | C50  | C51  | 1.381 (4) |
| C13  | C27 | 1.367 (3) |  | C51  | C74  | 1.507 (3) |
| C14  | C15 | 1.392 (2) |  | C54  | C71  | 1.392 (4) |
| C14  | C22 | 1.384 (3) |  | C55  | C56  | 1.389 (4) |
| C16  | C17 | 1.452 (2) |  | C55  | C61  | 1.375 (4) |
| C17  | C44 | 1.365 (3) |  | C56  | C72  | 1.381 (4) |
| C18  | C30 | 1.388 (3) |  | C57  | C70  | 1.421 (3) |
| C18  | N35 | 1.421 (2) |  | C58  | C59  | 1.362 (4) |
| C18  | C36 | 1.387 (3) |  | C60  | C65  | 1.358 (4) |
| C19  | C31 | 1.364 (3) |  | C61  | C69  | 1.409 (5) |
| C19  | C32 | 1.374 (3) |  | C63  | C70  | 1.363 (4) |
| C20  | C25 | 1.385 (3) |  | C67  | C77  | 1.382 (4) |
| C21  | C42 | 1.469 (3) |  | C69  | C76  | 1.372 (7) |
| C22  | C29 | 1.387 (3) |  | C71  | C75  | 1.358 (5) |
| C23  | C29 | 1.395 (3) |  | C72  | C76  | 1.367 (6) |
| C24  | C33 | 1.420 (3) |  | C75  | C77  | 1.357 (5) |
| C24  | C46 | 1.368 (3) |  | C1AA | C3AA | 1.347 (4) |
| C25  | C30 | 1.389 (3) |  | C0AA | C3AA | 1.311 (7) |
| N26  | C29 | 1.412 (2) |  | C0AA | C5AA | 1.390 (8) |
| N26  | C40 | 1.408 (3) |  | C5AA | C4AA | 1.446 (6) |
| N26  | C43 | 1.422 (3) |  | C1   | C5   | 1.380 (3) |
| C27  | C49 | 1.424 (3) |  | C2   | C4   | 1.375 (4) |

|     |     |           |  |    |    |           |
|-----|-----|-----------|--|----|----|-----------|
| C28 | C39 | 1.377 (3) |  | C3 | C4 | 1.361 (5) |
| C28 | C52 | 1.378 (3) |  | C3 | C5 | 1.370 (5) |

**Table S6 Bond Angles for AC-PT.**

| Atom | Atom | Atom | Angle/°     |  | Atom | Atom | Atom | Angle/°     |
|------|------|------|-------------|--|------|------|------|-------------|
| C10  | N0AA | C6   | 104.36 (14) |  | C19  | C31  | C50  | 119.2 (2)   |
| C10  | N2   | C9   | 130.31 (14) |  | C19  | C32  | C47  | 119.3 (2)   |
| C16  | N2   | C9   | 123.61 (14) |  | C24  | C33  | C42  | 113.02 (17) |
| C16  | N2   | C10  | 105.47 (14) |  | C48  | C33  | C24  | 123.2 (2)   |
| C2AA | N1AA | C19  | 130.31 (14) |  | C48  | C33  | C42  | 123.8 (2)   |
| C7   | N1AA | C2AA | 105.38 (14) |  | C54  | C34  | N35  | 121.7 (2)   |
| C7   | N1AA | C19  | 123.52 (14) |  | C54  | C34  | C67  | 118.8 (2)   |
| N1AA | C2AA | C20  | 125.15 (15) |  | C67  | C34  | N35  | 119.5 (2)   |
| N3AA | C2AA | N1AA | 112.10 (14) |  | C34  | N35  | C18  | 120.09 (16) |
| N3AA | C2AA | C20  | 122.71 (15) |  | C34  | N35  | C55  | 120.65 (16) |
| C2AA | N3AA | C21  | 104.57 (15) |  | C55  | N35  | C18  | 118.39 (17) |
| N0AA | C6   | C13  | 139.42 (17) |  | C11  | C36  | C18  | 120.42 (17) |
| C16  | C6   | N0AA | 111.80 (15) |  | C9   | C37  | C39  | 118.8 (2)   |
| C16  | C6   | C13  | 108.72 (16) |  | C9   | C38  | C52  | 119.98 (19) |
| N1AA | C7   | C24  | 141.73 (17) |  | C28  | C39  | C37  | 122.1 (2)   |
| C21  | C7   | N1AA | 106.62 (15) |  | C1   | C40  | N26  | 122.35 (19) |
| C21  | C7   | C24  | 111.57 (16) |  | C1   | C40  | C2   | 118.2 (2)   |
| C13  | C8   | C17  | 112.75 (16) |  | C2   | C40  | N26  | 119.4 (2)   |
| C41  | C8   | C13  | 123.50 (19) |  | C8   | C41  | C45  | 116.0 (2)   |
| C41  | C8   | C17  | 123.74 (19) |  | C8   | C41  | C59  | 116.0 (2)   |
| C37  | C9   | N2   | 120.26 (17) |  | C59  | C41  | C45  | 128.0 (2)   |
| C38  | C9   | N2   | 119.54 (16) |  | C33  | C42  | C21  | 103.91 (16) |
| C38  | C9   | C37  | 120.14 (17) |  | C57  | C42  | C21  | 137.68 (19) |
| N0AA | C10  | N2   | 112.04 (15) |  | C57  | C42  | C33  | 118.40 (19) |
| N0AA | C10  | C15  | 122.60 (15) |  | C1AA | C43  | N26  | 118.8 (2)   |
| N2   | C10  | C15  | 125.36 (15) |  | C4AA | C43  | N26  | 120.8 (3)   |
| C36  | C11  | C20  | 121.32 (17) |  | C4AA | C43  | C1AA | 120.4 (3)   |
| C23  | C12  | C15  | 121.65 (17) |  | C17  | C44  | C58  | 118.2 (2)   |
| C8   | C13  | C6   | 103.96 (15) |  | C49  | C45  | C41  | 120.73 (19) |
| C27  | C13  | C6   | 137.29 (18) |  | C24  | C46  | C60  | 118.3 (2)   |
| C27  | C13  | C8   | 118.75 (17) |  | C51  | C47  | C32  | 121.4 (2)   |
| C22  | C14  | C15  | 120.83 (17) |  | C33  | C48  | C63  | 116.1 (2)   |

|      |     |      |             |  |      |      |      |           |
|------|-----|------|-------------|--|------|------|------|-----------|
| C12  | C15 | C10  | 118.00 (15) |  | C33  | C48  | C65  | 116.2 (2) |
| C14  | C15 | C10  | 124.12 (16) |  | C63  | C48  | C65  | 127.7 (2) |
| C14  | C15 | C12  | 117.86 (16) |  | C45  | C49  | C27  | 122.5 (2) |
| N2   | C16 | C17  | 142.03 (17) |  | C51  | C50  | C31  | 121.6 (2) |
| C6   | C16 | N2   | 106.32 (15) |  | C47  | C51  | C50  | 117.9 (2) |
| C6   | C16 | C17  | 111.53 (16) |  | C47  | C51  | C74  | 121.2 (3) |
| C8   | C17 | C16  | 103.01 (16) |  | C50  | C51  | C74  | 120.9 (3) |
| C44  | C17 | C8   | 118.35 (18) |  | C28  | C52  | C38  | 121.2 (2) |
| C44  | C17 | C16  | 138.61 (19) |  | C34  | C54  | C71  | 119.7 (3) |
| C30  | C18 | N35  | 120.99 (18) |  | C56  | C55  | N35  | 120.2 (2) |
| C36  | C18 | C30  | 118.88 (16) |  | C61  | C55  | N35  | 120.3 (3) |
| C36  | C18 | N35  | 120.11 (18) |  | C61  | C55  | C56  | 119.5 (3) |
| C31  | C19 | N1AA | 119.63 (17) |  | C72  | C56  | C55  | 121.0 (3) |
| C31  | C19 | C32  | 120.65 (18) |  | C42  | C57  | C70  | 118.4 (2) |
| C32  | C19 | N1AA | 119.63 (18) |  | C59  | C58  | C44  | 123.1 (2) |
| C11  | C20 | C2AA | 117.96 (15) |  | C58  | C59  | C41  | 120.5 (2) |
| C25  | C20 | C2AA | 123.97 (16) |  | C65  | C60  | C46  | 122.7 (2) |
| C25  | C20 | C11  | 118.00 (16) |  | C55  | C61  | C69  | 118.9 (4) |
| N3AA | C21 | C42  | 140.02 (17) |  | C70  | C63  | C48  | 120.5 (2) |
| C7   | C21 | N3AA | 111.33 (16) |  | C60  | C65  | C48  | 120.6 (2) |
| C7   | C21 | C42  | 108.58 (16) |  | C77  | C67  | C34  | 120.3 (3) |
| C14  | C22 | C29  | 120.79 (17) |  | C76  | C69  | C61  | 120.8 (3) |
| C12  | C23 | C29  | 120.15 (18) |  | C63  | C70  | C57  | 122.7 (2) |
| C33  | C24 | C7   | 102.92 (16) |  | C75  | C71  | C54  | 121.1 (3) |
| C46  | C24 | C7   | 138.06 (19) |  | C76  | C72  | C56  | 119.9 (4) |
| C46  | C24 | C33  | 119.01 (18) |  | C77  | C75  | C71  | 119.3 (3) |
| C20  | C25 | C30  | 120.91 (17) |  | C72  | C76  | C69  | 119.9 (3) |
| C29  | N26 | C43  | 119.90 (17) |  | C75  | C77  | C67  | 120.8 (3) |
| C40  | N26 | C29  | 122.05 (16) |  | C3AA | C1AA | C43  | 122.5 (4) |
| C40  | N26 | C43  | 116.91 (16) |  | C3AA | C0AA | C5AA | 122.7 (4) |
| C13  | C27 | C49  | 118.5 (2)   |  | C0AA | C3AA | C1AA | 118.6 (5) |
| C39  | C28 | C52  | 117.69 (18) |  | C0AA | C5AA | C4AA | 118.7 (4) |
| C39  | C28 | C62  | 121.4 (2)   |  | C43  | C4AA | C5AA | 117.0 (4) |
| C52  | C28 | C62  | 120.9 (2)   |  | C40  | C1   | C5   | 120.5 (2) |
| C22  | C29 | C23  | 118.72 (17) |  | C4   | C2   | C40  | 120.6 (3) |
| C22  | C29 | N26  | 121.14 (17) |  | C4   | C3   | C5   | 119.0 (3) |

|     |     |     |             |  |    |    |    |           |
|-----|-----|-----|-------------|--|----|----|----|-----------|
| C23 | C29 | N26 | 120.14 (18) |  | C3 | C4 | C2 | 120.9 (3) |
| C18 | C30 | C25 | 120.46 (17) |  | C3 | C5 | C1 | 120.8 (3) |

| Atom | Atom | Length/Å   |  | Atom | Atom | Length/Å   |
|------|------|------------|--|------|------|------------|
| N9   | C10  | 1.409 (11) |  | C72  | C71  | 1.301 (19) |
| N9   | C36  | 1.427 (11) |  | C6   | C5   | 1.418 (14) |
| N9   | C8   | 1.393 (11) |  | N62  | C69  | 1.432 (13) |
| N45  | C44  | 1.339 (11) |  | N62  | C56  | 1.447 (12) |
| N45  | C46  | 1.368 (11) |  | C58  | C57  | 1.375 (14) |
| N55  | C75  | 1.443 (10) |  | C1   | C13  | 1.349 (14) |
| N55  | C44  | 1.381 (11) |  | C61  | C56  | 1.378 (15) |
| N55  | C54  | 1.349 (11) |  | C21  | C16  | 1.393 (14) |
| N11  | C10  | 1.296 (12) |  | C18  | C17  | 1.395 (12) |
| N11  | C12  | 1.370 (12) |  | C51  | C88  | 1.453 (16) |
| C52  | C53  | 1.430 (13) |  | C51  | C50  | 1.393 (16) |
| C52  | C47  | 1.427 (13) |  | C69  | C70  | 1.361 (13) |
| C52  | C51  | 1.400 (12) |  | C69  | C74  | 1.381 (14) |
| C10  | C19  | 1.481 (12) |  | C88  | C87  | 1.303 (16) |
| C75  | C80  | 1.367 (13) |  | C65  | C64  | 1.393 (16) |
| C75  | C76  | 1.381 (13) |  | C65  | C66  | 1.38 (2)   |
| C36  | C37  | 1.378 (13) |  | C29  | C34  | 1.379 (14) |
| C36  | C35  | 1.402 (13) |  | C29  | C30  | 1.398 (14) |
| C44  | C59  | 1.462 (12) |  | C38  | C39  | 1.373 (15) |
| C2   | C3   | 1.392 (13) |  | C38  | C41  | 1.510 (14) |
| C2   | C7   | 1.408 (13) |  | C50  | C49  | 1.360 (18) |
| C2   | C1   | 1.407 (13) |  | C4   | C5   | 1.409 (16) |
| C54  | C46  | 1.400 (12) |  | C79  | C78  | 1.377 (17) |
| C54  | C53  | 1.458 (12) |  | C79  | C0AA | 1.489 (17) |
| C80  | C79  | 1.395 (13) |  | C16  | C17  | 1.370 (14) |
| C8   | C12  | 1.338 (12) |  | C70  | C71  | 1.437 (16) |
| C8   | C7   | 1.453 (11) |  | C56  | C57  | 1.393 (14) |
| C59  | C60  | 1.387 (13) |  | C13  | C14  | 1.437 (16) |
| C59  | C58  | 1.386 (13) |  | C15  | C14  | 1.357 (18) |
| C23  | N22  | 1.442 (12) |  | C35  | C40  | 1.417 (15) |
| C23  | C24  | 1.370 (14) |  | C34  | C33  | 1.379 (17) |

|     |     |            |  |      |      |            |
|-----|-----|------------|--|------|------|------------|
| C23 | C28 | 1.407 (14) |  | C48  | C49  | 1.410 (17) |
| C19 | C20 | 1.399 (12) |  | C30  | C31  | 1.337 (16) |
| C19 | C18 | 1.386 (13) |  | C24  | C25  | 1.380 (18) |
| N22 | C29 | 1.389 (13) |  | C77  | C76  | 1.350 (15) |
| N22 | C16 | 1.413 (11) |  | C77  | C78  | 1.370 (18) |
| C46 | C47 | 1.446 (12) |  | C28  | C27  | 1.46 (2)   |
| C12 | C1  | 1.486 (12) |  | C33  | C32  | 1.355 (18) |
| C63 | N62 | 1.389 (12) |  | C26  | C27  | 1.30 (3)   |
| C63 | C64 | 1.368 (15) |  | C26  | C25  | 1.37 (3)   |
| C63 | C68 | 1.367 (14) |  | C68  | C67  | 1.309 (17) |
| C3  | C4  | 1.396 (16) |  | C74  | C73  | 1.390 (17) |
| C3  | C15 | 1.432 (16) |  | C40  | C39  | 1.377 (17) |
| C37 | C38 | 1.386 (13) |  | C31  | C32  | 1.418 (17) |
| C20 | C21 | 1.365 (12) |  | C66  | C67  | 1.36 (2)   |
| C53 | C86 | 1.328 (12) |  | C41  | F0AA | 1.227 (14) |
| C60 | C61 | 1.404 (13) |  | C41  | F7   | 1.237 (14) |
| C7  | C6  | 1.407 (12) |  | C41  | F9   | 1.239 (15) |
| C86 | C87 | 1.435 (12) |  | F2   | C0AA | 1.180 (14) |
| C47 | C48 | 1.383 (14) |  | C0AA | F4   | 1.295 (17) |
| C72 | C73 | 1.38 (2)   |  | C0AA | F5   | 1.200 (16) |

**Table S8 Bond Angles for AC-mCF3**

| Atom | Atom | Atom | Angle/°   |  | Atom | Atom | Atom | Angle/°    |
|------|------|------|-----------|--|------|------|------|------------|
| C10  | N9   | C36  | 128.7 (7) |  | C2   | C1   | C12  | 103.5 (7)  |
| C8   | N9   | C10  | 104.0 (7) |  | C13  | C1   | C2   | 119.8 (9)  |
| C8   | N9   | C36  | 127.2 (7) |  | C13  | C1   | C12  | 136.7 (9)  |
| C44  | N45  | C46  | 104.6 (7) |  | C56  | C61  | C60  | 117.8 (9)  |
| C44  | N55  | C75  | 126.3 (6) |  | C20  | C21  | C16  | 121.5 (10) |
| C54  | N55  | C75  | 126.0 (7) |  | C19  | C18  | C17  | 118.6 (9)  |
| C54  | N55  | C44  | 107.7 (7) |  | C52  | C51  | C88  | 115.2 (9)  |
| C10  | N11  | C12  | 106.0 (7) |  | C50  | C51  | C52  | 117.0 (10) |
| C47  | C52  | C53  | 112.7 (8) |  | C50  | C51  | C88  | 127.7 (10) |
| C51  | C52  | C53  | 123.8 (9) |  | C70  | C69  | N62  | 119.6 (9)  |
| C51  | C52  | C47  | 123.4 (8) |  | C70  | C69  | C74  | 121.6 (10) |
| N9   | C10  | C19  | 120.6 (7) |  | C74  | C69  | N62  | 118.7 (8)  |
| N11  | C10  | N9   | 111.8 (8) |  | C87  | C88  | C51  | 119.1 (9)  |
| N11  | C10  | C19  | 127.3 (8) |  | C66  | C65  | C64  | 117.3 (13) |

|     |     |     |           |  |     |     |      |            |
|-----|-----|-----|-----------|--|-----|-----|------|------------|
| C80 | C75 | N55 | 120.6 (7) |  | N22 | C29 | C30  | 122.9 (9)  |
| C80 | C75 | C76 | 119.8 (9) |  | C34 | C29 | N22  | 120.8 (9)  |
| C76 | C75 | N55 | 119.5 (8) |  | C34 | C29 | C30  | 116.4 (10) |
| C37 | C36 | N9  | 120.0 (8) |  | C37 | C38 | C41  | 117.9 (10) |
| C37 | C36 | C35 | 121.9 (9) |  | C39 | C38 | C37  | 119.9 (10) |
| C35 | C36 | N9  | 118.0 (8) |  | C39 | C38 | C41  | 122.2 (10) |
| N45 | C44 | N55 | 111.4 (7) |  | C63 | C64 | C65  | 120.5 (11) |
| N45 | C44 | C59 | 125.4 (8) |  | C49 | C50 | C51  | 119.8 (10) |
| N55 | C44 | C59 | 122.9 (7) |  | C3  | C4  | C5   | 121.7 (9)  |
| C3  | C2  | C7  | 123.3 (9) |  | C80 | C79 | C0AA | 119.3 (10) |
| C3  | C2  | C1  | 123.4 (8) |  | C78 | C79 | C80  | 121.0 (10) |
| C1  | C2  | C7  | 113.3 (8) |  | C78 | C79 | C0AA | 119.7 (10) |
| N55 | C54 | C46 | 105.4 (8) |  | C21 | C16 | N22  | 121.2 (9)  |
| N55 | C54 | C53 | 143.4 (8) |  | C17 | C16 | N22  | 120.1 (9)  |
| C46 | C54 | C53 | 110.5 (7) |  | C17 | C16 | C21  | 118.7 (8)  |
| C75 | C80 | C79 | 118.9 (9) |  | C4  | C5  | C6   | 120.5 (9)  |
| N9  | C8  | C7  | 140.9 (8) |  | C69 | C70 | C71  | 118.4 (11) |
| C12 | C8  | N9  | 107.0 (7) |  | C61 | C56 | N62  | 119.7 (9)  |
| C12 | C8  | C7  | 112.0 (8) |  | C61 | C56 | C57  | 122.3 (9)  |
| C60 | C59 | C44 | 121.0 (8) |  | C57 | C56 | N62  | 117.9 (10) |
| C58 | C59 | C44 | 121.6 (9) |  | C1  | C13 | C14  | 118.4 (11) |
| C58 | C59 | C60 | 117.4 (9) |  | C88 | C87 | C86  | 124.8 (10) |
| C24 | C23 | N22 | 120.3 (9) |  | C14 | C15 | C3   | 120.5 (10) |
| C24 | C23 | C28 | 121.4 (9) |  | C36 | C35 | C40  | 117.6 (10) |
| C28 | C23 | N22 | 118.3 (9) |  | C58 | C57 | C56  | 117.5 (9)  |
| C20 | C19 | C10 | 120.0 (8) |  | C33 | C34 | C29  | 120.6 (12) |
| C18 | C19 | C10 | 119.5 (8) |  | C47 | C48 | C49  | 117.7 (11) |
| C18 | C19 | C20 | 120.5 (8) |  | C31 | C30 | C29  | 122.4 (11) |
| C29 | N22 | C23 | 121.5 (7) |  | C23 | C24 | C25  | 119.1 (13) |
| C29 | N22 | C16 | 121.4 (8) |  | C76 | C77 | C78  | 121.6 (11) |
| C16 | N22 | C23 | 117.1 (8) |  | C23 | C28 | C27  | 114.6 (12) |
| N45 | C46 | C54 | 110.9 (8) |  | C32 | C33 | C34  | 123.6 (12) |
| N45 | C46 | C47 | 140.3 (9) |  | C16 | C17 | C18  | 121.5 (9)  |
| C54 | C46 | C47 | 108.8 (8) |  | C27 | C26 | C25  | 119.5 (12) |
| N11 | C12 | C1  | 140.5 (8) |  | C67 | C68 | C63  | 125.0 (14) |
| C8  | C12 | N11 | 111.1 (8) |  | C69 | C74 | C73  | 118.1 (11) |

|     |     |     |            |  |      |      |     |            |
|-----|-----|-----|------------|--|------|------|-----|------------|
| C8  | C12 | C1  | 108.3 (8)  |  | C77  | C76  | C75 | 120.3 (11) |
| C64 | C63 | N62 | 122.8 (9)  |  | C77  | C78  | C79 | 118.2 (10) |
| C68 | C63 | N62 | 120.1 (10) |  | C39  | C40  | C35 | 119.4 (10) |
| C68 | C63 | C64 | 117.1 (10) |  | C72  | C73  | C74 | 119.7 (12) |
| C2  | C3  | C4  | 117.0 (9)  |  | C38  | C39  | C40 | 121.8 (10) |
| C2  | C3  | C15 | 116.0 (10) |  | C15  | C14  | C13 | 121.9 (11) |
| C4  | C3  | C15 | 127.1 (10) |  | C72  | C71  | C70 | 119.3 (11) |
| C36 | C37 | C38 | 119.3 (9)  |  | C50  | C49  | C48 | 124.2 (10) |
| C21 | C20 | C19 | 119.2 (9)  |  | C30  | C31  | C32 | 121.6 (11) |
| C52 | C53 | C54 | 103.1 (7)  |  | C26  | C27  | C28 | 123.5 (13) |
| C86 | C53 | C52 | 117.9 (8)  |  | C67  | C66  | C65 | 122.3 (12) |
| C86 | C53 | C54 | 139.0 (8)  |  | C68  | C67  | C66 | 117.5 (13) |
| C59 | C60 | C61 | 121.8 (9)  |  | C33  | C32  | C31 | 115.4 (10) |
| C2  | C7  | C8  | 102.9 (8)  |  | C26  | C25  | C24 | 121.7 (15) |
| C6  | C7  | C2  | 119.3 (8)  |  | F0AA | C41  | C38 | 116.4 (9)  |
| C6  | C7  | C8  | 137.8 (8)  |  | F0AA | C41  | F7  | 106.5 (13) |
| C53 | C86 | C87 | 118.8 (9)  |  | F0AA | C41  | F9  | 106.8 (16) |
| C52 | C47 | C46 | 104.7 (7)  |  | F7   | C41  | C38 | 113.3 (12) |
| C48 | C47 | C52 | 117.8 (9)  |  | F7   | C41  | F9  | 102.2 (15) |
| C48 | C47 | C46 | 137.5 (10) |  | F9   | C41  | C38 | 110.7 (10) |
| C71 | C72 | C73 | 122.6 (12) |  | F2   | C0AA | C79 | 118.1 (13) |
| C7  | C6  | C5  | 118.2 (8)  |  | F2   | C0AA | F4  | 94.9 (16)  |
| C63 | N62 | C69 | 121.4 (7)  |  | F2   | C0AA | F5  | 111.6 (16) |
| C63 | N62 | C56 | 119.9 (8)  |  | F4   | C0AA | C79 | 110.6 (13) |
| C69 | N62 | C56 | 118.6 (8)  |  | F5   | C0AA | C79 | 116.9 (9)  |
| C57 | C58 | C59 | 123.2 (9)  |  | F5   | C0AA | F4  | 100.8 (17) |

### Thermal properties:

The thermal properties of the AC-derivatives were examined by thermogravimetric analysis (TGA) under a nitrogen atmosphere at the scanning rate of 10 °C/min. Thermogravimetric graph of the dyes are shown in Fig. 2 and the corresponding data are listed in Table 2. All the dyes shown good thermal stability and the thermal decomposition temperatures ( $T_d$ ) are in the range of 390-430 °C. Fluorene substituted AC-derivative (AC-FI) display higher thermal decomposition

temperatures  $\sim 430$  °C and the order of stability is AC-mCF<sub>3</sub> < AC-pCF<sub>3</sub> < AC-PT < AC-Ph < AC-FI. This difference probably arises due to N1 functionilization of imidazole group with defferent substitutions. Thermal stability of the material is important for applications in organic electronic devices.

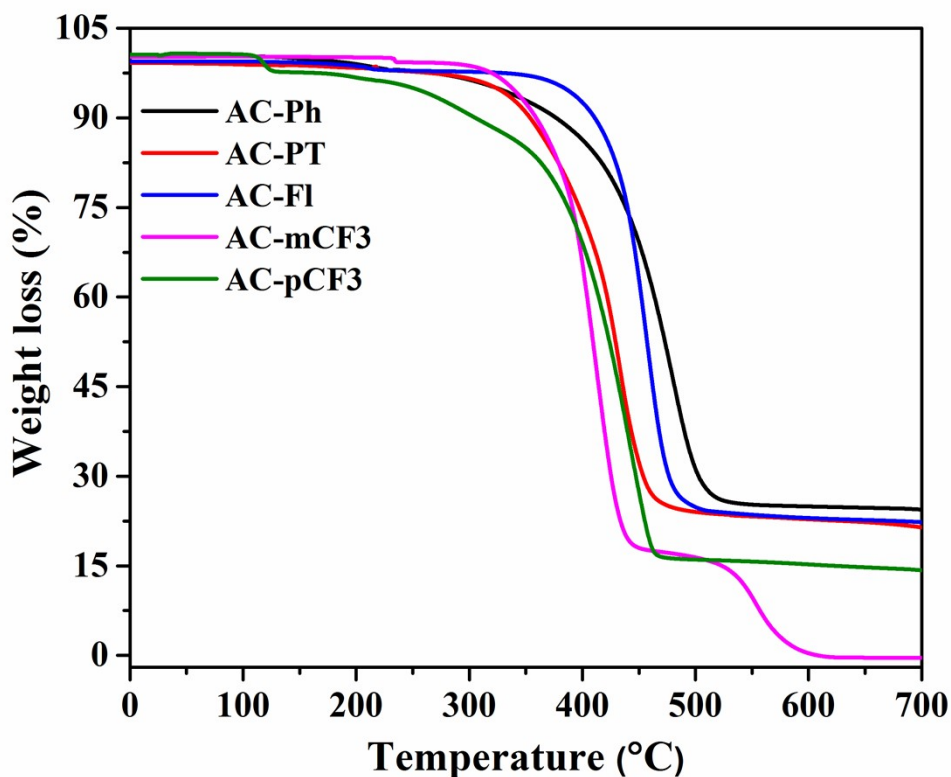

**Fig. 2.** Thermogravimetric curves AC-derivatives.

**Table SI9.** Computed vertical transitions and their oscillator strengths and configurations.<sup>1,2</sup>

| Compound     | State   | f     | $\lambda_{\max}$ nm | Energy (eV) | Configuration                                                            |
|--------------|---------|-------|---------------------|-------------|--------------------------------------------------------------------------|
| <b>AC-Ph</b> |         |       |                     |             |                                                                          |
| <b>Gas</b>   | Triplet | 0     | 553.7               | 2.239       | HOMO-2 $\rightarrow$ LUMO (20.65%)                                       |
|              |         |       |                     |             | HOMO-1 $\rightarrow$ LUMO (48.94%)                                       |
|              |         |       |                     |             | HOMO-1 $\rightarrow$ LUMO+1 (13.37%)                                     |
|              | S1      | 0.073 | 424.03              | 2.924       | HOMO $\rightarrow$ LUMO (68.12%)                                         |
|              | S2      | 0.543 | 338.64              | 3.661       | HOMO-1 $\rightarrow$ LUMO (43.48%)<br>HOMO $\rightarrow$ LUMO+1 (44.20%) |
| <b>DCM</b>   | Triplet | 0     | 548.98              | 2.258       | HOMO-2 $\rightarrow$ LUMO (16.89%)                                       |
|              |         |       |                     |             | HOMO-1 $\rightarrow$ LUMO (54.89%)                                       |



|                |         |        |        |       |                                                                          |
|----------------|---------|--------|--------|-------|--------------------------------------------------------------------------|
|                |         |        |        |       | HOMO-1 → LUMO+1 (12.62%)                                                 |
|                | S1      | 0.108  | 419.68 | 2.954 | HOMO → LUMO (68.12%)                                                     |
|                | S2      | 0.701  | 343.06 | 3.614 | HOMO-1 → LUMO (43.48%)<br>HOMO → LUMO+1 (44.20%)                         |
| <b>AC-PT</b>   |         |        |        |       |                                                                          |
| <b>Gas</b>     | Triplet | 0      | 624.95 | 1.983 | HOMO-1 → LUMO (33.45%)<br>HOMO → LUMO (60.35%)                           |
|                | S1      | 0.071  | 491.40 | 2.523 | HOMO-1 → LUMO (19.44%)<br>HOMO → LUMO (67.21%)                           |
| <b>DCM</b>     | Triplet | 0      | 614.54 | 2.017 | HOMO-1 → LUMO (36.10%)<br>HOMO → LUMO (58.74%)                           |
|                | S1      | 0.086  | 491.49 | 2.522 | HOMO-1 → LUMO (20.49%)<br>HOMO → LUMO (67.10%)                           |
| <b>AC-FI</b>   |         |        |        |       |                                                                          |
| <b>Gas</b>     | Triplet | 0      | 627.89 | 1.974 | HOMO → LUMO (60.73%)                                                     |
|                | S1      | 0.0795 | 493.71 | 2.511 | HOMO → LUMO (67.39%)                                                     |
|                | S2      | 0.0718 | 408.57 | 3.034 | HOMO-1 → LUMO (67.5%)                                                    |
| <b>DCM</b>     | Triplet | 0      | 617.99 | 2.006 | HOMO → LUMO (59.25%)                                                     |
|                | S1      | 0.096  | 494.10 | 2.509 | HOMO → LUMO (67.34%)                                                     |
|                | S2      | 0.297  | 394.35 | 3.144 | HOMO-1 → LUMO (52.53%)                                                   |
| <b>AC-mCF3</b> |         |        |        |       |                                                                          |
| <b>Gas</b>     | Triplet | 0      | 625.29 | 1.982 | HOMO → LUMO (59.62%)<br>HOMO-1 → LUMO (34.60%)                           |
|                | S1      | 2.539  | 488.22 | 2.539 | HOMO → LUMO (67.38%)                                                     |
| <b>DCM</b>     | Triplet | 0      | 617.73 | 2.007 | HOMO → LUMO (59.25%)                                                     |
|                | S1      | 0.0795 | 493.71 | 2.511 | HOMO → LUMO (57.93%)<br>HOMO-1 → LUMO (37.40%)                           |
| <b>AC-pCF3</b> |         |        |        |       |                                                                          |
| <b>Gas</b>     | Triplet | 0      | 629.58 | 1.969 | HOMO → LUMO (59.36%)<br>HOMO-1 → LUMO (34.95%)                           |
|                | S1      | 0.091  | 494.10 | 2.509 | HOMO → LUMO (67.45%)                                                     |
|                | S2      | 0.112  | 403.12 | 3.075 | HOMO-1 → LUMO (27.83%)<br>HOMO → LUMO (11.42%)<br>HOMO → LUMO+1 (62.48%) |
| <b>DCM</b>     | Triplet | 0      | 618.93 | 2.003 | HOMO → LUMO (58.19%)<br>HOMO-1 → LUMO (36.99%)                           |
|                | S1      | 0.107  | 493.54 | 2.512 | HOMO → LUMO (67.38%)                                                     |
|                | S2      | 0.212  | 395.37 | 3.135 | HOMO-1 → LUMO (52.94%)<br>HOMO → LUMO (17.34%)<br>HOMO → LUMO+1 (41.75%) |

## SI10 Atomic coordinates of Acenaphthene derivatives

### AC-Ph:

|   |           |           |           |
|---|-----------|-----------|-----------|
| 6 | -5.748327 | 1.399372  | 0.405711  |
| 6 | -4.952490 | 0.329404  | 0.050151  |
| 6 | -5.591155 | -0.888886 | -0.356415 |
| 6 | -6.978571 | -1.053790 | -0.416581 |
| 6 | -7.771972 | 0.072245  | -0.044295 |
| 6 | -7.163827 | 1.248672  | 0.351567  |
| 1 | -5.322817 | 2.345423  | 0.725249  |
| 6 | -4.653375 | -1.914542 | -0.686431 |
| 6 | -7.448103 | -2.333827 | -0.839062 |
| 1 | -8.855971 | 0.001291  | -0.071272 |
| 1 | -7.782349 | 2.095797  | 0.633925  |
| 6 | -6.547435 | -3.331444 | -1.160698 |
| 6 | -5.136754 | -3.139744 | -1.089238 |
| 1 | -8.516507 | -2.520970 | -0.904975 |
| 1 | -6.921800 | -4.299957 | -1.479771 |
| 1 | -4.467198 | -3.953421 | -1.350773 |
| 6 | -3.532282 | 0.014781  | -0.052784 |
| 6 | -3.340881 | -1.293545 | -0.471027 |
| 6 | -1.377035 | -0.503415 | -0.161427 |
| 7 | -2.271797 | 0.533242  | 0.157440  |
| 7 | -2.019477 | -1.608962 | -0.536619 |
| 6 | -2.004423 | 1.814562  | 0.731547  |
| 6 | -2.448784 | 2.966661  | 0.075259  |
| 6 | -1.337202 | 1.911395  | 1.956304  |
| 6 | -2.221892 | 4.218492  | 0.648480  |
| 1 | -2.961138 | 2.873239  | -0.876849 |
| 6 | -1.103033 | 3.167214  | 2.514304  |
| 1 | -1.009094 | 1.007950  | 2.458444  |
| 6 | -1.545604 | 4.321771  | 1.865201  |
| 1 | -2.567135 | 5.112418  | 0.138009  |
| 1 | -0.582107 | 3.241989  | 3.463925  |
| 1 | -1.365512 | 5.297133  | 2.306628  |
| 6 | 0.086068  | -0.402552 | -0.139743 |
| 6 | 0.795525  | 0.789967  | -0.365432 |
| 6 | 0.830132  | -1.581589 | 0.055365  |
| 6 | 2.185870  | 0.809627  | -0.364340 |
| 1 | 0.263741  | 1.715988  | -0.550101 |
| 6 | 2.217261  | -1.569781 | 0.038244  |
| 1 | 0.294771  | -2.513553 | 0.198432  |
| 6 | 2.921676  | -0.369356 | -0.162614 |
| 1 | 2.709869  | 1.744109  | -0.532642 |
| 1 | 2.766805  | -2.493771 | 0.181783  |
| 7 | 4.339305  | -0.351807 | -0.169411 |

|   |          |           |           |
|---|----------|-----------|-----------|
| 6 | 5.039642 | 0.470571  | -1.095509 |
| 6 | 4.622655 | 0.553415  | -2.433685 |
| 6 | 6.161105 | 1.208648  | -0.684687 |
| 6 | 5.309245 | 1.365275  | -3.334123 |
| 1 | 3.761480 | -0.020126 | -2.759601 |
| 6 | 6.852058 | 2.003133  | -1.597230 |
| 1 | 6.485459 | 1.152988  | 0.349026  |
| 6 | 6.429512 | 2.091422  | -2.925026 |
| 1 | 7.718147 | 2.567004  | -1.262544 |
| 6 | 5.068743 | -1.160618 | 0.745583  |
| 6 | 6.206958 | -1.865179 | 0.322045  |
| 6 | 4.664217 | -1.263969 | 2.086200  |
| 6 | 6.925237 | -2.647129 | 1.224152  |
| 1 | 6.521859 | -1.794542 | -0.713588 |
| 6 | 5.378532 | -2.063278 | 2.976182  |
| 1 | 3.789717 | -0.716861 | 2.421884  |
| 6 | 6.514901 | -2.756126 | 2.554264  |
| 1 | 7.803201 | -3.185802 | 0.879160  |
| 1 | 5.050912 | -2.132366 | 4.009598  |
| 1 | 7.072765 | -3.372619 | 3.252256  |
| 1 | 6.966256 | 2.716960  | -3.631521 |
| 1 | 4.973284 | 1.417250  | -4.365829 |

**AC-PT:**

|   |           |           |           |
|---|-----------|-----------|-----------|
| 6 | -5.697144 | 1.086461  | 0.430798  |
| 6 | -4.874323 | 0.041312  | 0.063414  |
| 6 | -5.481924 | -1.188014 | -0.357382 |
| 6 | -6.864682 | -1.387261 | -0.420346 |
| 6 | -7.686491 | -0.286056 | -0.035521 |
| 6 | -7.108398 | 0.900723  | 0.374227  |
| 1 | -5.295188 | 2.038927  | 0.761491  |
| 6 | -4.518214 | -2.185417 | -0.699236 |
| 6 | -7.301517 | -2.673669 | -0.858383 |
| 1 | -8.768341 | -0.384178 | -0.063910 |
| 1 | -7.748332 | 1.728546  | 0.666064  |
| 6 | -6.375688 | -3.644100 | -1.191501 |
| 6 | -4.970311 | -3.417529 | -1.116981 |
| 1 | -8.364814 | -2.887061 | -0.927179 |
| 1 | -6.725225 | -4.617914 | -1.522436 |
| 1 | -4.280297 | -4.210757 | -1.388008 |
| 6 | -3.446533 | -0.235423 | -0.042881 |
| 6 | -3.221990 | -1.533628 | -0.476344 |
| 6 | -1.279373 | -0.696377 | -0.158543 |
| 7 | -2.199973 | 0.312971  | 0.172450  |
| 7 | -1.893145 | -1.814174 | -0.546172 |
| 6 | -1.963571 | 1.595234  | 0.759849  |
| 6 | -2.430590 | 2.740656  | 0.107299  |

|   |           |           |           |
|---|-----------|-----------|-----------|
| 6 | -1.301037 | 1.696464  | 1.984419  |
| 6 | -2.242800 | 4.008967  | 0.668092  |
| 1 | -2.936036 | 2.633295  | -0.847958 |
| 6 | -1.097756 | 2.959132  | 2.539879  |
| 1 | -0.951502 | 0.799891  | 2.483846  |
| 6 | -1.563620 | 4.101943  | 1.891193  |
| 1 | -0.577635 | 3.049778  | 3.488681  |
| 1 | -1.399224 | 5.079108  | 2.337691  |
| 6 | 0.180792  | -0.558792 | -0.136423 |
| 6 | 0.859734  | 0.653746  | -0.348811 |
| 6 | 0.954349  | -1.720919 | 0.044776  |
| 6 | 2.249190  | 0.708113  | -0.348802 |
| 1 | 0.304488  | 1.568119  | -0.521790 |
| 6 | 2.340786  | -1.674117 | 0.026828  |
| 1 | 0.442607  | -2.667525 | 0.177771  |
| 6 | 3.014375  | -0.454231 | -0.161107 |
| 1 | 2.749830  | 1.657076  | -0.507132 |
| 1 | 2.913512  | -2.585571 | 0.159641  |
| 7 | 4.431512  | -0.401230 | -0.169006 |
| 6 | 5.110166  | 0.441468  | -1.092520 |
| 6 | 4.685197  | 0.524862  | -2.428239 |
| 6 | 6.218149  | 1.200081  | -0.682088 |
| 6 | 5.350651  | 1.356608  | -3.326347 |
| 1 | 3.834512  | -0.064083 | -2.754160 |
| 6 | 6.888254  | 2.014546  | -1.592519 |
| 1 | 6.548549  | 1.144679  | 0.349722  |
| 6 | 6.457779  | 2.102918  | -2.917765 |
| 1 | 7.744131  | 2.593911  | -1.257984 |
| 6 | 5.180681  | -1.197782 | 0.740679  |
| 6 | 6.334202  | -1.873995 | 0.312384  |
| 6 | 4.779590  | -1.317835 | 2.080944  |
| 6 | 7.070468  | -2.644865 | 1.209535  |
| 1 | 6.646580  | -1.790210 | -0.723014 |
| 6 | 5.512340  | -2.105949 | 2.965890  |
| 1 | 3.893113  | -0.792553 | 2.420074  |
| 6 | 6.663626  | -2.770728 | 2.539249  |
| 1 | 7.960024  | -3.161770 | 0.860935  |
| 1 | 5.187100  | -2.188365 | 3.999083  |
| 1 | 7.235667  | -3.378622 | 3.233307  |
| 1 | 6.978238  | 2.743954  | -3.622556 |
| 1 | 5.008689  | 1.408423  | -4.356101 |
| 6 | -2.765996 | 5.246341  | -0.022590 |
| 1 | -3.672258 | 5.619817  | 0.469294  |
| 1 | -2.030050 | 6.056222  | 0.000580  |
| 1 | -3.017131 | 5.046565  | -1.067599 |

**AC-FI:**

|   |           |           |           |
|---|-----------|-----------|-----------|
| 6 | -5.525165 | -0.869589 | 0.586670  |
| 6 | -4.566747 | -1.820256 | 0.299427  |
| 6 | -5.000492 | -3.150773 | -0.015575 |
| 6 | -6.342948 | -3.541759 | -0.046114 |
| 6 | -7.307761 | -2.535048 | 0.256905  |
| 6 | -6.897671 | -1.250087 | 0.559017  |
| 1 | -5.258097 | 0.153751  | 0.830722  |
| 6 | -3.910320 | -4.028766 | -0.300200 |
| 6 | -6.599892 | -4.904829 | -0.382774 |
| 1 | -8.366071 | -2.781487 | 0.247801  |
| 1 | -7.645086 | -0.495111 | 0.785556  |
| 6 | -5.550643 | -5.760836 | -0.659082 |
| 6 | -4.189842 | -5.338089 | -0.623280 |
| 1 | -7.624007 | -5.266084 | -0.422220 |
| 1 | -5.764084 | -6.794923 | -0.914199 |
| 1 | -3.398165 | -6.046058 | -0.848688 |
| 6 | -3.114062 | -1.909187 | 0.205150  |
| 6 | -2.715958 | -3.188402 | -0.153165 |
| 6 | -0.909120 | -2.050547 | -0.000252 |
| 7 | -1.958194 | -1.163511 | 0.300055  |
| 7 | -1.365644 | -3.272907 | -0.277795 |
| 6 | 0.523309  | -1.736786 | 0.020070  |
| 6 | 1.102957  | -0.702190 | 0.776091  |
| 6 | 1.385650  | -2.570952 | -0.718374 |
| 6 | 2.480534  | -0.505467 | 0.786238  |
| 1 | 0.483944  | -0.064559 | 1.395844  |
| 6 | 2.758258  | -2.373908 | -0.715113 |
| 1 | 0.951230  | -3.377870 | -1.297455 |
| 6 | 3.331339  | -1.335900 | 0.040107  |
| 1 | 2.906677  | 0.285861  | 1.393676  |
| 1 | 3.399239  | -3.024390 | -1.300553 |
| 7 | 4.736847  | -1.142546 | 0.058562  |
| 6 | 5.275558  | 0.171251  | -0.010352 |
| 6 | 4.758195  | 1.105887  | -0.921441 |
| 6 | 6.338893  | 0.551142  | 0.824219  |
| 6 | 5.292515  | 2.391403  | -0.989036 |
| 1 | 3.942803  | 0.815164  | -1.575420 |
| 6 | 6.875233  | 1.834316  | 0.739679  |
| 1 | 6.740005  | -0.165150 | 1.533347  |
| 6 | 6.354953  | 2.763976  | -0.162796 |
| 1 | 7.697346  | 2.111231  | 1.393448  |
| 6 | 5.609557  | -2.262236 | 0.141501  |
| 6 | 6.788750  | -2.304209 | -0.620025 |
| 6 | 5.306319  | -3.342362 | 0.986228  |

|   |           |           |           |
|---|-----------|-----------|-----------|
| 6 | 7.646509  | -3.398137 | -0.527180 |
| 1 | 7.026243  | -1.477502 | -1.280922 |
| 6 | 6.161637  | -4.439850 | 1.057418  |
| 1 | 4.400051  | -3.315847 | 1.581679  |
| 6 | 7.338436  | -4.474549 | 0.306895  |
| 1 | 8.554374  | -3.413580 | -1.123549 |
| 1 | 5.910730  | -5.266637 | 1.715765  |
| 1 | 8.005554  | -5.328570 | 0.370655  |
| 1 | 6.772878  | 3.764030  | -0.223244 |
| 6 | -1.933348 | 0.248475  | 0.528064  |
| 6 | -1.429335 | 1.112968  | -0.454294 |
| 6 | -2.471597 | 0.750555  | 1.719529  |
| 6 | -1.467387 | 2.481731  | -0.224360 |
| 1 | -1.025195 | 0.698196  | -1.372187 |
| 6 | -2.523958 | 2.127223  | 1.941790  |
| 1 | -2.846483 | 0.054773  | 2.462998  |
| 6 | -0.980673 | 3.613618  | -1.128328 |
| 6 | -2.022121 | 2.992171  | 0.967885  |
| 1 | -2.947290 | 2.510067  | 2.865721  |
| 6 | -1.358179 | 4.837982  | -0.295776 |
| 6 | -1.954794 | 4.457936  | 0.923030  |
| 6 | -1.178632 | 6.184470  | -0.594419 |
| 6 | -2.371684 | 5.420371  | 1.844812  |
| 6 | -1.597305 | 7.150055  | 0.328568  |
| 1 | -0.719286 | 6.491134  | -1.530601 |
| 6 | -2.188175 | 6.770009  | 1.538128  |
| 1 | -2.831578 | 5.129773  | 2.785308  |
| 1 | -1.461854 | 8.203931  | 0.103781  |
| 1 | -2.507123 | 7.531219  | 2.243995  |
| 6 | 0.557230  | 3.532369  | -1.365144 |
| 1 | 0.760694  | 2.618076  | -1.937306 |
| 1 | 0.838986  | 4.368620  | -2.017999 |
| 6 | -1.690113 | 3.604137  | -2.512947 |
| 1 | -1.373015 | 2.700219  | -3.048917 |
| 1 | -1.300344 | 4.449946  | -3.093737 |
| 6 | -3.219649 | 3.669484  | -2.482707 |
| 1 | -3.572144 | 4.582115  | -1.993086 |
| 1 | -3.620326 | 3.660505  | -3.501248 |
| 1 | -3.647802 | 2.815187  | -1.949882 |
| 6 | 1.427220  | 3.551238  | -0.105576 |
| 1 | 2.485754  | 3.469704  | -0.369339 |
| 1 | 1.291628  | 4.476818  | 0.461315  |
| 1 | 1.188989  | 2.712778  | 0.555156  |
| 1 | 4.886875  | 3.099123  | -1.706627 |

**AC-mCF3:**

|   |           |           |           |
|---|-----------|-----------|-----------|
| 6 | -5.447149 | 0.173031  | 0.307966  |
| 6 | -4.523842 | -0.811144 | 0.013425  |
| 6 | -5.009277 | -2.113584 | -0.342602 |
| 6 | -6.366644 | -2.444980 | -0.407021 |
| 6 | -7.292797 | -1.406642 | -0.092448 |
| 6 | -6.833478 | -0.149112 | 0.250298  |
| 1 | -5.151769 | 1.183300  | 0.572765  |
| 6 | -3.954687 | -3.033761 | -0.625143 |
| 6 | -6.676311 | -3.787840 | -0.777974 |
| 1 | -8.360236 | -1.607236 | -0.124474 |
| 1 | -7.551063 | 0.631694  | 0.484645  |
| 6 | -5.660780 | -4.684292 | -1.052271 |
| 6 | -4.284148 | -4.322965 | -0.980731 |
| 1 | -7.714367 | -4.102373 | -0.843358 |
| 1 | -5.914353 | -5.702379 | -1.333338 |
| 1 | -3.519467 | -5.059999 | -1.206048 |
| 6 | -3.073699 | -0.962480 | -0.067080 |
| 6 | -2.727285 | -2.254737 | -0.429338 |
| 6 | -0.868072 | -1.238015 | -0.135429 |
| 7 | -1.879204 | -0.296636 | 0.137095  |
| 7 | -1.376478 | -2.420212 | -0.472089 |
| 6 | -1.772546 | 1.005653  | 0.702268  |
| 6 | -2.493545 | 2.052357  | 0.128672  |
| 6 | -1.008074 | 1.228251  | 1.854821  |
| 6 | -2.474051 | 3.314702  | 0.726842  |
| 1 | -3.073157 | 1.878037  | -0.771054 |
| 6 | -0.967836 | 2.499770  | 2.420140  |
| 1 | -0.458892 | 0.406067  | 2.298771  |
| 6 | -1.707715 | 3.547511  | 1.868066  |
| 1 | -0.371711 | 2.671211  | 3.310597  |
| 1 | -1.694643 | 4.532554  | 2.319244  |
| 6 | 0.572099  | -0.961993 | -0.119706 |
| 6 | 1.131357  | 0.283047  | -0.456082 |
| 6 | 1.452485  | -2.017988 | 0.180473  |
| 6 | 2.508216  | 0.474548  | -0.460380 |
| 1 | 0.490013  | 1.114048  | -0.727552 |
| 6 | 2.827810  | -1.836693 | 0.160416  |
| 1 | 1.034879  | -2.992489 | 0.408263  |
| 6 | 3.381894  | -0.581790 | -0.151540 |
| 1 | 2.914654  | 1.446318  | -0.717783 |
| 1 | 3.485086  | -2.669023 | 0.386749  |
| 7 | 4.784793  | -0.390296 | -0.163635 |
| 6 | 5.384877  | 0.448703  | -1.145503 |
| 6 | 4.989422  | 0.369047  | -2.490030 |
| 6 | 6.385872  | 1.362657  | -0.781349 |

|   |           |           |           |
|---|-----------|-----------|-----------|
| 6 | 5.578176  | 1.195899  | -3.444627 |
| 1 | 4.222470  | -0.341849 | -2.778741 |
| 6 | 6.981725  | 2.172190  | -1.746350 |
| 1 | 6.691978  | 1.430829  | 0.257196  |
| 6 | 6.579699  | 2.098506  | -3.081388 |
| 1 | 7.755440  | 2.874031  | -1.448496 |
| 6 | 5.607403  | -1.038898 | 0.799561  |
| 6 | 6.821870  | -1.628309 | 0.414603  |
| 6 | 5.221375  | -1.092996 | 2.148344  |
| 6 | 7.632058  | -2.250516 | 1.362098  |
| 1 | 7.123201  | -1.593731 | -0.626872 |
| 6 | 6.029562  | -1.733624 | 3.085170  |
| 1 | 4.287975  | -0.632422 | 2.454035  |
| 6 | 7.240759  | -2.312291 | 2.700974  |
| 1 | 8.568447  | -2.701863 | 1.046912  |
| 1 | 5.715651  | -1.766746 | 4.124584  |
| 1 | 7.871152  | -2.804399 | 3.435034  |
| 1 | 7.041389  | 2.735717  | -3.829248 |
| 1 | 5.261137  | 1.121709  | -4.480877 |
| 6 | -3.344371 | 4.392419  | 0.138965  |
| 9 | -3.176869 | 4.497160  | -1.197676 |
| 9 | -4.657589 | 4.119293  | 0.344121  |
| 9 | -3.098840 | 5.603231  | 0.678309  |

**AC-pCF3:**

|   |           |           |           |
|---|-----------|-----------|-----------|
| 6 | -5.657033 | 0.403911  | -0.151544 |
| 6 | -4.788496 | -0.668879 | -0.167179 |
| 6 | -5.342999 | -1.991566 | -0.195055 |
| 6 | -6.716133 | -2.256820 | -0.212751 |
| 6 | -7.585043 | -1.125359 | -0.199376 |
| 6 | -7.058960 | 0.152381  | -0.167778 |
| 1 | -5.300170 | 1.428584  | -0.123411 |
| 6 | -4.338542 | -3.006275 | -0.193306 |
| 6 | -7.096957 | -3.632153 | -0.234576 |
| 1 | -8.661720 | -1.271219 | -0.211132 |
| 1 | -7.733872 | 1.003262  | -0.154335 |
| 6 | -6.130526 | -4.620117 | -0.234426 |
| 6 | -4.736412 | -4.324701 | -0.212593 |
| 1 | -8.150165 | -3.899169 | -0.249366 |
| 1 | -6.438106 | -5.661722 | -0.250303 |
| 1 | -4.012499 | -5.133792 | -0.211477 |
| 6 | -3.349320 | -0.908588 | -0.161005 |
| 6 | -3.071624 | -2.266779 | -0.162463 |
| 6 | -1.162866 | -1.303955 | -0.077951 |
| 7 | -2.123604 | -0.274004 | -0.097181 |



|   |           |           |           |
|---|-----------|-----------|-----------|
| 7 | -1.732681 | -2.505745 | -0.112615 |
| 6 | -1.941409 | 1.128226  | 0.074908  |
| 6 | -2.497164 | 2.012541  | -0.856303 |
| 6 | -1.241967 | 1.620705  | 1.181558  |
| 6 | -2.355242 | 3.386264  | -0.678465 |
| 1 | -3.026986 | 1.618229  | -1.716838 |
| 6 | -1.092100 | 2.994106  | 1.348608  |
| 1 | -0.820703 | 0.927808  | 1.900683  |
| 6 | -1.649503 | 3.879115  | 0.421951  |
| 1 | -2.776380 | 4.074465  | -1.403008 |
| 1 | -0.544692 | 3.379946  | 2.201150  |
| 6 | 0.290771  | -1.109074 | -0.079644 |
| 6 | 0.934717  | -0.021922 | -0.695553 |
| 6 | 1.097143  | -2.102304 | 0.506969  |
| 6 | 2.320686  | 0.084937  | -0.698435 |
| 1 | 0.354525  | 0.749412  | -1.189115 |
| 6 | 2.481207  | -2.009634 | 0.490829  |
| 1 | 0.614777  | -2.963185 | 0.956459  |
| 6 | 3.120030  | -0.907245 | -0.105915 |
| 1 | 2.792244  | 0.937477  | -1.174397 |
| 1 | 3.079125  | -2.794392 | 0.941042  |
| 7 | 4.531801  | -0.805024 | -0.118681 |
| 6 | 5.201978  | -0.270534 | -1.255774 |
| 6 | 4.823383  | -0.652371 | -2.552533 |
| 6 | 6.256788  | 0.641132  | -1.093497 |
| 6 | 5.481417  | -0.121997 | -3.660310 |
| 1 | 4.014831  | -1.363606 | -2.684019 |
| 6 | 6.920978  | 1.151627  | -2.206973 |
| 1 | 6.550605  | 0.942763  | -0.093687 |
| 6 | 6.535765  | 0.778619  | -3.496084 |
| 1 | 5.176506  | -0.427959 | -4.656959 |
| 1 | 7.735567  | 1.855858  | -2.064124 |
| 6 | 5.294959  | -1.245089 | 0.999305  |
| 6 | 6.468312  | -1.991355 | 0.808101  |
| 6 | 4.890430  | -0.933879 | 2.307061  |
| 6 | 7.221334  | -2.408474 | 1.903681  |
| 1 | 6.783114  | -2.239082 | -0.199998 |
| 6 | 5.640399  | -1.371098 | 3.396941  |
| 1 | 3.988843  | -0.350444 | 2.460641  |
| 6 | 6.811515  | -2.106357 | 3.203758  |
| 1 | 8.126656  | -2.985464 | 1.738259  |
| 1 | 5.313324  | -1.121871 | 4.402354  |
| 1 | 7.397022  | -2.439368 | 4.055068  |
| 1 | 7.050919  | 1.183859  | -4.361460 |
| 6 | -1.542971 | 5.364818  | 0.637690  |
| 9 | -2.608394 | 5.847039  | 1.319203  |

|   |           |          |           |
|---|-----------|----------|-----------|
| 9 | -0.440991 | 5.692090 | 1.346987  |
| 9 | -1.490689 | 6.037746 | -0.533292 |

References:

1. M. J. Frisch, et. al., Gaussian, Inc., Wallingford CT, 2009.
2. (a) R. Bauernschmitt and R. Ahlrichs, Chem. Phys. Lett., 1996, 256, 454–464; (b) G. Scalmani, M. J. Frisch, B. Mennucci, J. Tomasi, R. Cammi and V. Barone, J. Chem. Phys., 2006, 124, 094107.
